# Supplementary material for: Cohort profile: the Mâncio Lima cohort study of urban malaria in Amazonian Brazil
Source: PubMed Central journal article supplement — BMJ Open. 2021 Nov 16;11(11):e048073. doi: 10.1136/bmjopen-2020-048073 (PMC8727682; doi:10.1136/bmjopen-2020-048073), 2021-11-16
Supplement: bmjopen-2020-048073.draft_revisions.pdf [file bmjopen-2020-048073.draft_revisions.pdf]

# BMJ Open

BMJ Open is committed to open peer review. As part of this commitment we make the peer review history of every article we publish publicly available.

When an article is published we post the peer reviewers' comments and the authors' responses online. We also post the versions of the paper that were used during peer review. These are the versions that the peer review comments apply to.

The versions of the paper that follow are the versions that were submitted during the peer review process. They are not the versions of record or the final published versions. They should not be cited or distributed as the published version of this manuscript.

BMJ Open is an open access journal and the full, final, typeset and author-corrected version of record of the manuscript is available on our site with no access controls, subscription charges or pay-per-view fees (<http://bmjopen.bmj.com>).

If you have any questions on BMJ Open's open peer review process please email [info.bmjopen@bmj.com](mailto:info.bmjopen@bmj.com)

# BMJ Open

## Cohort profile: The Mâncio Lima cohort study of urban malaria in Amazonian Brazil

|                               |                                                                                                                                                                                                                                                                                                                                                                                  |
|-------------------------------|----------------------------------------------------------------------------------------------------------------------------------------------------------------------------------------------------------------------------------------------------------------------------------------------------------------------------------------------------------------------------------|
| Journal:                      | <i>BMJ Open</i>                                                                                                                                                                                                                                                                                                                                                                  |
| Manuscript ID                 | bmjopen-2020-048073                                                                                                                                                                                                                                                                                                                                                              |
| Article Type:                 | Cohort profile                                                                                                                                                                                                                                                                                                                                                                   |
| Date Submitted by the Author: | 17-Dec-2020                                                                                                                                                                                                                                                                                                                                                                      |
| Complete List of Authors:     | Johansen, Igor; University of Sao Paulo, Parasitology<br>Rodrigues, Priscila; University of Sao Paulo, Parasitology<br>Tonini, Juliana; University of Sao Paulo, Parasitology<br>Vinetz, Joseph; Yale University School of Medicine<br>Castro, Marcia; Harvard School of Public Health, Global Health and Population<br>Ferreira, Marcelo; University of Sao Paulo, Parasitology |
| Keywords:                     | Epidemiology < TROPICAL MEDICINE, PARASITOLOGY, Epidemiology < INFECTIOUS DISEASES                                                                                                                                                                                                                                                                                               |
|                               |                                                                                                                                                                                                                                                                                                                                                                                  |

SCHOLARONE™  
Manuscripts

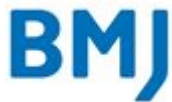

I, the Submitting Author has the right to grant and does grant on behalf of all authors of the Work (as defined in the below author licence), an exclusive licence and/or a non-exclusive licence for contributions from authors who are: i) UK Crown employees; ii) where BMJ has agreed a CC-BY licence shall apply, and/or iii) in accordance with the terms applicable for US Federal Government officers or employees acting as part of their official duties; on a worldwide, perpetual, irrevocable, royalty-free basis to BMJ Publishing Group Ltd ("BMJ") its licensees and where the relevant Journal is co-owned by BMJ to the co-owners of the Journal, to publish the Work in this journal and any other BMJ products and to exploit all rights, as set out in our [licence](#).

The Submitting Author accepts and understands that any supply made under these terms is made by BMJ to the Submitting Author unless you are acting as an employee on behalf of your employer or a postgraduate student of an affiliated institution which is paying any applicable article publishing charge ("APC") for Open Access articles. Where the Submitting Author wishes to make the Work available on an Open Access basis (and intends to pay the relevant APC), the terms of reuse of such Open Access shall be governed by a Creative Commons licence – details of these licences and which [Creative Commons](#) licence will apply to this Work are set out in our licence referred to above.

Other than as permitted in any relevant BMJ Author's Self Archiving Policies, I confirm this Work has not been accepted for publication elsewhere, is not being considered for publication elsewhere and does not duplicate material already published. I confirm all authors consent to publication of this Work and authorise the granting of this licence.

1  
2  
3 Cohort profile: The Mâncio Lima cohort study of urban malaria in Amazonian  
4  
5  
6 Brazil  
7  
8  
9

10 Igor C Johansen,<sup>1\*</sup> Priscila T Rodrigues,<sup>1\*</sup> Juliana Tonini,<sup>1</sup> Joseph M Vinetz,<sup>2</sup> Marcia C Castro,<sup>3</sup>  
11  
12  
13 Marcelo U Ferreira<sup>1</sup>  
14  
15

16  
17  
18 <sup>1</sup>Department of Parasitology, Institute of Biomedical Sciences, University of São Paulo, São  
19  
20 Paulo, SP, Brazil.  
21

22 <sup>2</sup>Section of Infectious Diseases, Department of Internal Medicine, Yale School of Medicine New  
23  
24 Haven, CT, USA.  
25

26  
27 <sup>3</sup>Department of Global Health and Population, Harvard T H Chan School of Public Health,  
28  
29 Boston, MA, USA.  
30

31  
32  
33  
34 \*These authors contributed equally to this work.  
35

36 Correspondence to: Dr Marcelo U Ferreira, Department of Parasitology, Institute of Biomedical  
37  
38 Sciences, University of São Paulo, Av. Prof. Lineu Prestes 1374, 05508-900 São Paulo, SP,  
39  
40 Brazil. Tel. +55-11-30917746. E-mail: muferre@usp.br  
41  
42  
43

44  
45 Word count (main text): 2,623  
46  
47  
48  
49  
50  
51  
52  
53  
54  
55  
56  
57  
58  
59  
60

## ABSTRACT

**Purpose** This population-based open cohort study aims to investigate biological and sociodemographic drivers of malaria transmission in the main urban hotspot of Amazonian Brazil.

**Participants** Nearly 20% of the households in the northwestern town of Mâncio Lima were randomly selected and 2,690 participants were enrolled since March 2018. Sociodemographic, occupational, behavioral, and morbidity information was collected during consecutive study visits. Blood samples from participants older than 3 months were used for malaria diagnosis and human genetic studies: those from study participants with laboratory-confirmed malaria have been cryopreserved for genotypic and phenotypic characterization of parasites. Serology was introduced in 2020 to measure the prevalence and longevity of SARS-CoV-2 antibodies.

**Findings to date** Malaria prevalence rates were low (up to 1.0% for *P. vivax* and 0.6% for *P. falciparum*) during 5 consecutive cross-sectional surveys between March-April 2018 and October-November 2020; 63% of infections diagnosed by microscopy were asymptomatic. Malaria risk is heterogeneously distributed, with 20% study participants contributing 86% of the overall burden of *P. vivax* infection. Adult males are at greatest risk of infection and human mobility across the urban-rural interface may contribute to sustained malaria transmission. Local parasites are genetically diverse and fragmented into discrete inbred lineages that remain stable over time and space.

1  
2  
3 **Future plans** Two follow-up visits, with similar study protocols, are planned in 2021. We aim to  
4 identify high-risk individuals that fuel onwards malaria transmission and represent a priority  
5 target for more intensive and effective control interventions.  
6  
7  
8  
9

10  
11  
12 **Registration** This study has been registered at ClinicalTrials.gov (NCT03689036).  
13  
14

15  
16  
17 Abstract word count: 249  
18  
19

20  
21 **Key words** malaria; Amazon; epidemiology; risk factors; SARS-CoV-2 antibodies  
22  
23  
24  
25  
26  
27  
28  
29  
30  
31  
32  
33  
34  
35  
36  
37  
38  
39  
40  
41  
42  
43  
44  
45  
46  
47  
48  
49  
50  
51  
52  
53  
54  
55  
56  
57  
58  
59  
60

### Strengths and limitations of this study

► This is the first population-based cohort study to address the emerging risk of malaria transmission in urbanized spaces in the Amazon.

► Nearly 20% of the households in town of Mâncio Lima, the main urban malaria hotspot in Brazil, were randomly drawn from census listings and 2,690 participants were enrolled and followed-up since March 2018.

► Sociodemographic, occupational, behavioral, and morbidity information and capillary blood samples were collected during five study visits; venous blood from confirmed malaria infections have been cryopreserved for genotypic and phenotypic parasite characterization.

► Main potential limitations include: (a) generalizability of the study results since the cohort population comprises residents in a single malaria hotspot in the Amazon; (b) loss to follow-up due to the high mobility of the target population; and (c) risk of recall bias during interviews.

## INTRODUCTION

Although local malaria transmission has decreased substantially over the past two decades, 120 million people continue to have some risk of infection in Latin America and the Caribbean.<sup>1</sup> The Amazon Basin accounts for approximately 90% of the malaria cases in the Americas; 72% of them are due to *Plasmodium vivax*. Rural communities such as riverine villages, frontier farming settlements, gold mining enclaves, and Amerindian reserves are disproportionately affected.<sup>2</sup>

Despite the low force of infection found across the Amazon, nearly one order of magnitude lower than that in rural Africa,<sup>3</sup> a minority of highly exposed individuals develops clinical immunity to malaria following infection and eventually constitutes a substantial infectious reservoir comprised of asymptomatic parasite carriers that are overlooked by routine surveillance.<sup>3-8</sup> Importantly, blood from asymptomatic *P. vivax* carriers can infect local malaria vectors despite low mean parasite density.<sup>9</sup>

The Amazon has experienced an accelerated urban growth, characterized by massive rural-to-urban migration, unplanned housing, and inadequate infrastructure, that challenges its conventional representation as a densely forested territory interspersed by small and isolated human settlements.<sup>10</sup> Urban residents now account for 72.5% of the population of the Amazon Basin of Brazil and almost 20% of the 24.4 million Amazonian live in cities with >500,000 inhabitants.<sup>11</sup> Importantly, malaria transmission has been increasingly documented within and near densely populated urban centers of the Amazon,<sup>12-14</sup> with occasional large outbreaks in cities.<sup>15</sup> We hypothesize that asymptomatic carriers continuously move malaria parasites across



1  
2  
3 the urban-rural interface and contribute significantly to outbreaks and sustained malaria  
4  
5 transmission in urbanized spaces in the region.<sup>16</sup>  
6  
7  
8  
9

10 The dynamics, determinants and public health consequences of urban malaria remain largely  
11  
12 unexplored as cities and towns grow and proliferate in the Amazon. This population-based open  
13  
14 cohort study was set up to investigate a wide range of biological and sociodemographic factors  
15  
16 that drive malaria endemicity in the main urban transmission hotspot of Amazonian Brazil. The  
17  
18 long-term goal is to provide scientific evidence that can be translated into effective public health  
19  
20 interventions for malaria control and elimination. The original study has since expanded to  
21  
22 include SARS-CoV-2 antibody measurements during the ongoing COVID-19 pandemic in this  
23  
24 hard-hit region.<sup>17</sup>  
25  
26  
27  
28  
29

## 30 31 **COHORT DESCRIPTION**

### 32 33 34 35 **Study site**

36  
37 The Mâncio Lima cohort study is part of the National Institutes of Health (NIH)-funded  
38  
39 Amazonian International Center of Excellence for Malaria Research network, with the overall  
40  
41 aim of investigating malaria epidemiology, vector biology and ecology, diagnostics, transmission  
42  
43 biology, and clinical pathogenesis across a range of endemic settings in the Amazon Basin of  
44  
45 Peru and Brazil ([https://www.niaid.nih.gov/research/amazonian-international-center-excellence-](https://www.niaid.nih.gov/research/amazonian-international-center-excellence-malaria-research)  
46  
47 [malaria-research](https://www.niaid.nih.gov/research/amazonian-international-center-excellence-malaria-research)). The study site, the town of Mâncio Lima (07°36'51"S, 72°53'45"W), is  
48  
49 situated in the upper Juruá Valley region of Acre State, westernmost Brazil, close to the border  
50  
51 with Peru (Supplemental Fig. 1). Because urban areas in Brazil are defined according to  
52  
53  
54  
55  
56  
57  
58  
59  
60

1  
2  
3 relatively arbitrary administrative rules that do not necessarily consider population density and  
4 other internationally adopted criteria,<sup>18</sup> we delimited the town of Mâncio Lima essentially as  
5 done by the Brazilian Institute of Geography and Statistics (IBGE) but extended the urban area  
6 to two urbanized neighborhoods (Iracema and Pé da Terra) situated along the main road that  
7 crosses the town, following “urbanicity” criteria developed for use in this setting.<sup>19</sup> At the time  
8 of the study onset, the municipality of Mâncio Lima had an annual parasite incidence (API;  
9 number of new laboratory-confirmed malaria cases per 1,000 people per year) estimated at  
10 422.8, the highest for a municipality in Brazil.<sup>20</sup> With a typical equatorial humid climate, the area  
11 receives most rainfall between November and April, but malaria transmission occurs year-round.  
12 *Plasmodium vivax* accounts for 84% of local malaria cases and *P. falciparum* for 14%; <2% are  
13 coinfections with both species.<sup>21</sup> *P. vivax* infections are routinely treated with chloroquine (total  
14 dose, 25 mg of base/kg over 3 days) and primaquine (0.5 mg of base/kg/day for 7 days) and *P.*  
15 *falciparum* infections are treated with a fixed-dose combination of artemether (2-4 mg/kg/day)  
16 and lumefantrine (12-24 mg/kg/day) for 3 days.<sup>22</sup> Both treatment regimens remain highly  
17 efficacious in this area.<sup>23,24</sup>

### 40 Study population

41  
42 A baseline population census was conducted in Mâncio Lima between November 2015 and April  
43 2016. We enumerated 9,124 permanent residents in the urban area, with ages ranging between  
44 <1 month and 105 years, distributed into 2,329 households.<sup>21</sup> The cohort study sample comprises  
45 all members of randomly chosen urban households in Mâncio Lima. We used simple probability  
46 sampling to draw 534 households from the list of those enumerated during the baseline census  
47 survey. We allowed for up to 2.9% non-localized or empty houses and refusals and aimed to  
48  
49  
50  
51  
52  
53  
54  
55  
56  
57  
58  
59

1  
2  
3 enroll at least 20% of all households in the town. Because the target sample size was not reached  
4  
5 during the baseline visit, we used a list of randomly chosen substitute households during the  
6  
7 second visit to replace households that declined participation or were not located. Because this  
8  
9 cohort study was designed to evaluate a wide range of sociodemographic, clinical, and laboratory  
10  
11 exposures in the same population, no formal a-priori sample size and power calculations were  
12  
13 made.  
14  
15

### 16 17 18 19 **Participant recruitment and follow-up**

20  
21 Figure 1 presents the study flowchart. During the first study visit, between March and April  
22  
23 2018, we targeted the 534 households drawn from the census listings; 1,391 residents from 354  
24  
25 households were located and agreed to participate. To achieve the desired sample size, 147  
26  
27 “substitute” households were randomly selected and approached during the second visit. The  
28  
29 ongoing cohort is dynamic and new residents joining the household (those who moved in or were  
30  
31 born between study visits) are enrolled during the follow-up visits. Study participants leaving the  
32  
33 sampled households are retained in the cohort as long as they can be located by the field team  
34  
35 and their new residences, which are labelled as new households, are situated in the urban area of  
36  
37 Mâncio Lima. As a consequence, the total number of households in the sample has increased  
38  
39 since the second visit (Fig. 1). Some study participants could not be located during a follow-up  
40  
41 visit but are later “rescued” during the next visits, as indicated in Fig. 1; those who die or leave  
42  
43 the town are withdrawn. Five house visits were carried out until November 2020 and two follow-  
44  
45 up visits are planned for 2021. Subject to funding, follow-up will continue after 2021.  
46  
47  
48  
49  
50

51 < Figure 1 >  
52  
53  
54  
55  
56  
57  
58  
59  
60

### Data and sample collection

Structured questionnaires have been applied to study participants during study visits to obtain and update the demographic, socioeconomic, occupational, behavioral, and morbidity information listed in Table 1. GPS coordinates were obtained for all dwellings. Data were entered using tablets programmed with REDCap<sup>25</sup> and subsequently exported to Stata SE 15.0 (StataCorp, College Station, USA) for statistical analysis. Dates of follow-up visits and the number of participants interviewed in each visit are shown in Table 2.

< Table 1 >

< Table 2 >

During each visit, household members older than 3 months are invited to provide a finger-prick blood sample for on-site malaria diagnosis by microscopy and antigen-based rapid diagnostic tests. Giemsa-stained thick blood smears have at least 100 fields examined for malaria parasites under 1000× magnification by experienced local microscopists. Blood aliquots have been stored at -20°C for extraction of human and parasite DNA. Confirmatory molecular diagnosis of malaria has been made with a genus-specific quantitative PCR protocol that targets the mitochondrial genome of human-infecting malaria parasites<sup>26</sup> followed by species-specific tests. Human genetic studies are underway to identify Duffy blood group polymorphisms that modulate the ability of *P. vivax* merozoites to invade human red blood cells<sup>27</sup> and analyses of single-nucleotide polymorphisms and copy number variation in the gene encoding the cytochrome P450 (CYP) enzyme CYP2D6 that affect the metabolism of the antimalarial drug primaquine.<sup>28</sup> SARS-CoV-2 IgG antibodies were measured by ELISA in samples collected between October and November 2020; to estimate the longevity of SARS-CoV-2 antibody responses, seropositive individuals will be retested within 6 and 12 months.

1  
2  
3  
4  
5 Study participants with laboratory-confirmed malaria during the study visits are invited to  
6 contribute a 5 ml venous blood sample for further genotypic and phenotypic characterization of  
7 infecting parasites. Additional samples have been collected between the visits from consenting  
8 malaria patients from Mâncio Lima and surrounding rural sites to map the circulation of parasite  
9 lineages over time across the region. BioR01 Plus leukocyte-depletion filters (Fresenius Kabi,  
10 Bad Homburg, Germany) are used to reduce human DNA contamination before parasites'  
11 genome sequencing.<sup>29</sup>  
12  
13  
14  
15  
16  
17  
18  
19  
20  
21  
22  
23

#### 24 **Additional data sources**

25  
26 We have routinely retrieved all malaria case notifications in the study population that were  
27 entered into the electronic malaria notification system of the Ministry of Health of Brazil  
28 (Portuguese acronym, SIVEP-Malaria) since October 2015. Because malaria is a notifiable  
29 disease in Brazil and diagnostic testing and treatment are not available outside the network of  
30 government-run health care facilities, the electronic database comprises the vast majority of  
31 laboratory-confirmed malaria episodes countrywide.<sup>30</sup>  
32  
33  
34  
35  
36  
37  
38  
39  
40  
41  
42

43 Streams, wetlands rich in moriche palm trees, and natural and human-made fish farming ponds  
44 are widespread across the town of Mâncio Lima and serve as breeding habitats for malaria  
45 vectors.<sup>31</sup> Potential mosquito breeding sites have been mapped and are continuously monitored  
46 for larval density by the local staff of the National Malaria Control Program.  
47  
48  
49  
50  
51  
52  
53

#### 54 **Patient and public involvement**

1  
2  
3 Study participants had no role in the design, recruitment and conduct of the study. However, they  
4  
5 have been regularly informed on project objectives and main results by WhatsApp messages and  
6  
7 short videos. Links to some of these videos are provided in Supplemental Table 1. Local health  
8  
9 officers, including National Malaria Control Program personnel, are routinely briefed on study  
10  
11 findings during follow-up visits.  
12  
13  
14  
15

## 16 17 **FINDINGS TO DATE** 18

19  
20  
21 The Mâncio Lima cohort study of urban malaria is ongoing. Table 3 shows the characteristics of  
22  
23 participants and results of onsite malaria diagnosis during five study visits. A total of 2,690  
24  
25 residents were interviewed during at least one follow-up visit and 981 (36.5%) participated in all  
26  
27 visits (Supplemental Fig. 2). Capillary blood was obtained from 77.6-84.4% % of participants in  
28  
29 each visit, with a total of 7,781 samples collected (Table 3). Reasons for not providing blood  
30  
31 samples included age below 3 months and inability or refusal to perform a finger puncture.  
32  
33 Compared with the total population of Mâncio Lima enumerated during the baseline census, the  
34  
35 study sample has a very similar distribution according to sex and age groups (Supplemental Fig.  
36  
37 3) and place of residence (Supplemental Fig. 4). Overall malaria prevalence rates determined by  
38  
39 microscopy during the study visits ranged between 0.1% and 1.0% for *P. vivax* and 0.0% and  
40  
41 0.6% for *P. falciparum*; 39 of 62 (62.9%) infections were asymptomatic within one week prior to  
42  
43 blood collection. Ongoing analyses indicate that our PCR protocol detects up to 10 times more  
44  
45 malaria infections than microscopy in cohort participants.  
46  
47  
48  
49  
50

51 < Table 3 >  
52  
53  
54  
55  
56  
57  
58  
59  
60

1  
2  
3 Analyses published to date combined baseline information with routinely collected malaria  
4 surveillance data. We found a marked heterogeneity in malaria risk in the study population.  
5  
6 Adult males are at greatest risk of infection; poor housing and residence in the less urbanized  
7 periphery of the town are additional predictors of elevated malaria risk.<sup>21</sup> Nearly 14% of the  
8 study participants, mostly young children and the elderly, comprise a very low-risk fraction of  
9 the population who tend to remain uninfected.<sup>21</sup> We used compartmental susceptible-infected-  
10 susceptible transmission models to quantify malaria risk heterogeneity at the community level.  
11  
12 We estimate that 20% of the residents contribute 86% of the overall burden of *P. vivax* infection  
13 in Mâncio Lima.<sup>3</sup> These high-risk individuals eventually develop clinical immunity to malaria  
14 and constitute the asymptomatic infectious reservoir that fuels onwards transmission.  
15  
16  
17  
18  
19  
20  
21  
22  
23  
24  
25  
26  
27

28 To explore the relative contribution of human mobility to malaria in Mâncio Lima, we  
29 investigated patterns and determinants of urban-to-rural mobility, which is mostly work-related  
30 and places travelers at risk of malaria, and rural-to-urban mobility caused by malaria treatment  
31 seeking, which poses an additional risk of infection to urban residents. This information was  
32 retrieved from travel histories collected during follow-up visits. We found that the rural localities  
33 most frequently visited by urban residents are those with the most intense malaria transmission.  
34  
35 These are also the most frequent sources of imported malaria cases diagnosed in the town. The  
36 most mobile study participants are unemployed men 16 to 60-years old who maintain both urban  
37 and rural residences.<sup>32</sup>  
38  
39  
40  
41  
42  
43  
44  
45  
46  
47  
48  
49  
50

51 Parasites collected during the study were used to map local and regional transmission pathways  
52 of *P. vivax*. We found high genome-level diversity in the *P. vivax* population of Mâncio Lima,  
53  
54  
55  
56  
57  
58  
59  
60

1  
2  
3 but parasites were fragmented into discrete inbred lineages that co-circulate in the host  
4  
5 population over extended periods of time.<sup>33</sup> Microsatellite genotyping of local parasites also  
6  
7 revealed the persistence of near-clonal parasite lineages in the town, which have been interpreted  
8  
9 as evidence for sustained local *P. vivax* transmission.<sup>34</sup> We also found significant ancestry  
10  
11 sharing between parasites collected at a distance >700 km, suggesting that *P. vivax* lineages from  
12  
13 the Mâncio Lima hotspot seed regional malaria transmission.<sup>33</sup>  
14  
15  
16  
17  
18

### 19 **Strengths and limitations**

20  
21  
22  
23  
24 This is the first population-based cohort study of urban malaria in the Amazon. We combine  
25  
26 longitudinally collected data and samples to identify demographic, socioeconomic, occupational,  
27  
28 behavioral, and biological contributors to sustained malaria transmission in urbanized spaces that  
29  
30 may represent targets for control interventions. Importantly, the prospective study design enables  
31  
32 us to discern temporal associations between exposures and the outcomes of interest and to map  
33  
34 the spread of parasite lineages over space and time.  
35  
36  
37  
38  
39

40 Malaria-related outcomes in the study population have been measured in two ways. First, the  
41  
42 point prevalence of infection is determined during each follow-up visit. Conventional and  
43  
44 molecular diagnostic tests are carried out on all blood samples, that are collected regardless of  
45  
46 any current or recent symptom, allowing us to detect submicroscopic and asymptomatic parasite  
47  
48 carriage. Second, the incidence of clinical malaria between study visits is estimated from malaria  
49  
50 case notifications in the study population. These are essentially symptomatic infections  
51  
52 diagnosed by conventional microscopy. The main limitation of routine surveillance data is that  
53  
54  
55  
56  
57  
58  
59  
60



1  
2  
3 blood samples are not available for further confirmatory diagnostic tests. Moreover, although  
4  
5 surveillance comprises virtually all malaria episodes diagnosed by microscopy, submicroscopic  
6  
7 and asymptomatic malaria episodes experienced by the study population between follow-up  
8  
9 visits are overlooked.  
10  
11  
12  
13

14  
15 There has been considerable cohort attrition from initial recruitment to the most recent follow-up  
16  
17 visit, 32 months later. The study population is very mobile and many people are involved in  
18  
19 seasonal work in surrounding rural areas. Study participants, especially those who have a second  
20  
21 residence, often leave the town either temporally or definitively. This may reduce the statistical  
22  
23 power to test for associations between less prevalent exposures and outcomes. New residents in  
24  
25 the study households are continuously enrolled and returning participants are recued, keeping the  
26  
27 total number of participants remarkably stable between visits 2 and 5. However, it remains to be  
28  
29 determined whether the remaining and newly arriving participants are representative of the initial  
30  
31 study population regarding main exposures.  
32  
33  
34  
35  
36  
37

38 Another study limitation is the risk of recall bias during interviews. For example, information  
39  
40 regarding recent mobility and malaria-related symptoms is entirely dependent on participants'  
41  
42 reports. It is difficult to know with any precision how many antecedent episodes of malaria  
43  
44 infection an individual might have had.  
45  
46  
47  
48

49 Finally, the cohort includes residents in a single malaria hotspot in the Amazon, which may  
50  
51 compromise the generalizability of the main results. However, we argue that malaria  
52  
53 transmission is increasingly common in similar urbanized spaces in the Amazon.<sup>12-15</sup> Extensive  
54  
55  
56  
57  
58  
59  
60

1  
2  
3 deforestation and environmental degradation have displaced vectors to more urbanized areas  
4  
5 across the region, where suitable larval habitats, such as natural water bodies and human-made  
6  
7 fish farming ponds, are now widespread.<sup>13,15,31,35-38</sup>  
8  
9

## 11 **COLLABORATION**

12  
13  
14  
15  
16  
17 Datasets from the Mâncio Lima cohort study are not yet openly available, but will be deposited  
18  
19 in the ClinEpiDB (<https://clinepidb.org/ce/app>) repository of population-based epidemiological  
20  
21 studies. A repository database has been organized at the University of São Paulo, where future  
22  
23 published papers will be made available (<https://uspdigital.usp.br/repositorio/>). Researchers who  
24  
25 are interested in potential collaboration should contact the principal investigator, Marcelo U.  
26  
27 Ferreira ([muferre@usp.br](mailto:muferre@usp.br)), to complete a research plan for evaluation by the Amazonian  
28  
29 International Center of Excellence for Malaria Research steering committee.  
30  
31  
32  
33  
34

35 **Acknowledgments.** The authors thank Ajucilene G. Mota, Francisco Melo and their team at the  
36  
37 Health Secretary of Mâncio Lima for overall logistic support, to Rodrigo M. Corder, Anaclara  
38  
39 Pincelli, Lais C. Salla, Thaís C. de Oliveira, Vanessa C. Nicolete, Amanda Sampaio, and Madson  
40  
41 L. de Oliveira for fieldwork, and Maria José Menezes for her excellent administrative support.  
42  
43  
44  
45

46  
47 **Contributors.** M.U.F., J.M.V. and M.C.C. planned the cohort. M.U.F., P.T.R. and I.C.J.  
48  
49 coordinated the fieldwork, with the help of J.T. I.C.J., M.U.F. and M.C.C. supervised data  
50  
51 management and analysis. I.C.J. and M.U.F. wrote the first manuscript draft with input from all  
52  
53 authors, who have read and approved the final version of the manuscript.  
54  
55  
56  
57  
58  
59  
60

1  
2  
3  
4  
5  
6 **Funding.** The Mâncio Lima cohort study has been funded by the National Institutes of Health  
7 (NIH), United States (Amazonian International Center of Excellence for Malaria Research, U19  
8 AI089681 to J.M.V.), which also provides a post-doctoral fellowship to I.C.J., and the Fundação  
9 de Amparo à Pesquisa do Estado de São Paulo (FAPESP), Brazil (2016/18740-9, 2020/03611-4,  
10 and 2020/04505-3 to M.U.F.). P.T.R. receives a scholarship from FAPESP; M.U.F. and R.M.C.  
11 receive research scholarships from Conselho Nacional de Desenvolvimento Científico e  
12 Tecnológico (CNPq), Brazil (301011/2019-2). The funders had no role in study design, data  
13 collection and interpretation, or the decision to submit the work for publication.  
14  
15  
16  
17  
18  
19  
20  
21  
22  
23  
24  
25

26 **Competing interests.** None declared.  
27  
28  
29  
30

31 **Patient consent for publication.** Not required.  
32  
33  
34

35 **Ethics approval.** The authors assert that all procedures contributing to this work comply with  
36 the ethical standards of the relevant national and institutional committees on human  
37 experimentation and with the Helsinki Declaration of 1975, as revised in 2008. Study protocols  
38 have been approved by the Institutional Review Board of the Institute of Biomedical Sciences,  
39 University of São Paulo, and by the National Committee of Ethics in Research, Ministry of  
40 Health of Brazil (CAAE numbers 64767416.6.0000.5467 and 30481820.3.0000.5467). Written  
41 informed consent was obtained from all study participants or their parents/guardians.  
42  
43  
44  
45  
46  
47  
48  
49  
50  
51  
52  
53

54 **Provenance and peer review.** Not commissioned; externally peer-reviewed.  
55  
56  
57  
58  
59  
60

1  
2  
3  
4  
5 **Data availability statement.** Additional data are available on reasonable request.  
6  
7  
8  
9  
10

11  
12 **References**  
13  
14  
15

- 16  
17 1. World Health Organization. World Malaria Report 2020. Geneva, World Health Organization,  
18  
19 2020. Available at: <https://www.who.int/publications/i/item/9789240015791>  
20  
21  
22 2. Ferreira MU, Castro MC. Malaria situation in Latin America and the Caribbean: residual and  
23  
24 resurgent transmission and challenges for control and elimination. *Methods Mol Biol*  
25  
26 2019;2013:57-70.  
27  
28  
29 3. Corder RM, Ferreira MU, Gomes MGM. Modelling the epidemiology of residual *Plasmodium*  
30  
31 *vivax* malaria in a heterogeneous host population: A case study in the Amazon Basin.  
32  
33 *PLoS Comput Biol* 2020;16:e1007377.  
34  
35  
36  
37 4. Alves FP, Durlacher RR, Menezes MJ, *et al.* High prevalence of asymptomatic *Plasmodium*  
38  
39 *vivax* and *Plasmodium falciparum* infections in native Amazonian populations. *Am J*  
40  
41 *Trop Med Hyg* 2002;66:641-648.  
42  
43  
44 5. Roshanravan B, Kari E, Gilman RH, *et al.* Endemic malaria in the Peruvian Amazon region of  
45  
46 Iquitos. *Am J Trop Med Hyg* 2003;69:45-52.  
47  
48  
49 6. Ladeia-Andrade S, Ferreira MU, de Carvalho ME, *et al.* Age-dependent acquisition of  
50  
51 protective immunity to malaria in riverine populations of the Amazon Basin of Brazil.  
52  
53  
54 *Am J Trop Med Hyg* 2009;80:452-459.  
55  
56  
57  
58  
59  
60

- 1  
2  
3 7. Carrasco-Escobar G, Miranda-Alban J, Fernandez-Miñope C, *et al.* High prevalence of very-  
4  
5 low *Plasmodium falciparum* and *Plasmodium vivax* parasitaemia carriers in the Peruvian  
6  
7 Amazon: insights into local and occupational mobility-related transmission. *Malar J*  
8  
9 2017;16:415.  
10  
11
- 12  
13 8. Carrasco-Escobar G, Gamboa D, Castro MC, *et al.* Micro-epidemiology and spatial  
14  
15 heterogeneity of *P. vivax* parasitaemia in riverine communities of the Peruvian Amazon:  
16  
17 A multilevel analysis. *Sci Rep* 2017;7:8082.  
18  
19
- 20  
21 9. Alves FP, Gil LH, Marrelli MT, *et al.* Asymptomatic carriers of *Plasmodium spp.* as infection  
22  
23 source for malaria vector mosquitoes in the Brazilian Amazon. *J Med Entomol*  
24  
25 2005;42:777-779.  
26  
27
- 28  
29 10. Browder JO. The urban-rural interface: urbanization and tropical forest cover change. *Urban*  
30  
31 *Ecosyst* 2002;6:21-41.  
32
- 33  
34 11. Instituto Brasileiro de Geografia e Estatística (IBGE). Censo Demográfico 2010. Resultados  
35  
36 preliminares da amostra [in Portuguese]. Rio de Janeiro: IBGE, 2011.  
37
- 38  
39 12. Tada MS, Marques RP, Mesquita E, *et al.* Urban malaria in the Brazilian Western Amazon  
40  
41 Region I: high prevalence of asymptomatic carriers in an urban riverside district is  
42  
43 associated with a high level of clinical malaria. *Mem Inst Oswaldo Cruz* 2007;102:263-  
44  
45 269.  
46  
47
- 48  
49 13. Olson SH, Gangnon R, Silveira GA, Patz JA. Deforestation and malaria in Mâncio Lima  
50  
51 County, Brazil. *Emerg Infect Dis* 2010;16:1108-1115.  
52  
53  
54  
55  
56  
57  
58  
59  
60

- 1  
2  
3 14. Almeida ACG, Kuehn A, Castro AJM, *et al.* High proportions of asymptomatic and  
4  
5 submicroscopic *Plasmodium vivax* infections in a peri-urban area of low transmission in  
6  
7 the Brazilian Amazon. *Parasit Vectors* 2018;11:194.  
8  
9
- 10 15. Costa KM, de Almeida WA, Magalhães IB, *et al.* Malaria in Cruzeiro do Sul (Western  
11  
12 Brazilian Amazon): analysis of the historical series from 1998 to 2008 [in Portuguese].  
13  
14 *Rev Panam Salud Publica* 2010;28:353-360.  
15  
16
- 17 16. da Silva-Nunes M, Moreno M, Conn JE, *et al.* Amazonian malaria: asymptomatic human  
18  
19 reservoirs, diagnostic challenges, environmentally driven changes in mosquito vector  
20  
21 populations, and the mandate for sustainable control strategies. *Acta Trop* 2012;121:281-  
22  
23 91.  
24  
25  
26
- 27 17. Ramírez JD, Sordillo EM, Gotuzzo E, *et al.* SARS-CoV-2 in the Amazon region: A  
28  
29 harbinger of doom for Amerindians. *PLoS Negl Trop Dis* 2020;14:e0008686.  
30  
31  
32
- 33 18. Bueno MCD, Lima RNS. The degree of urbanisation in Brazil. *Regional Stat* 2019; 9: 72-84.  
34  
35
- 36 19. Dal'Asta AP, Lana RM, Amaral S, Codeço CT, Monteiro AMV. The urban gradient in  
37  
38 malaria-endemic municipalities in Acre: Revisiting the role of locality. *Int J Environ Res*  
39  
40 *Publ Health* 2018;15:1254.  
41  
42
- 43 20. Ministry of Health of Brazil. List of municipalities belonging to areas at risk or endemic for  
44  
45 malaria [in Portuguese]. Brasília, Ministry of Health of Brazil, 2019. Available at:  
46  
47 [https://www.saude.gov.br/images/pdf/2019/junho/25/Lista-de-municipios-pertencentes-](https://www.saude.gov.br/images/pdf/2019/junho/25/Lista-de-municipios-pertencentes-as-areas-de-risco-ou-endemicas-para-malaria.pdf)  
48  
49 [as-areas-de-risco-ou-endemicas-para-malaria.pdf](https://www.saude.gov.br/images/pdf/2019/junho/25/Lista-de-municipios-pertencentes-as-areas-de-risco-ou-endemicas-para-malaria.pdf)  
50  
51  
52  
53  
54  
55  
56  
57  
58  
59  
60

- 1  
2  
3 21. Corder RM, Paula GA, Pincelli A, Ferreira MU. Statistical modeling of surveillance data to  
4 identify correlates of urban malaria risk: A population-based study in the Amazon Basin.  
5  
6 *PLoS One* 2019;14:e0220980.  
7  
8  
9
- 10 22. Ministry of Health of Brazil. Guidelines for malaria therapy in Brazil [in Portuguese].  
11  
12 Brasília, Ministry of Health of Brazil, 2020. Available at:  
13  
14 [https://portalarquivos2.saude.gov.br/images/pdf/2020/janeiro/29/af-guia-tratamento-](https://portalarquivos2.saude.gov.br/images/pdf/2020/janeiro/29/af-guia-tratamento-malaria-28jan20-isbn.pdf)  
15 [malaria-28jan20-isbn.pdf](https://portalarquivos2.saude.gov.br/images/pdf/2020/janeiro/29/af-guia-tratamento-malaria-28jan20-isbn.pdf)  
16  
17  
18  
19
- 20 23. Ladeia-Andrade S, Menezes MJ, de Sousa TN, *et al.* Monitoring the efficacy of chloroquine-  
21 primaquine therapy for uncomplicated *Plasmodium vivax* malaria in the main  
22 transmission hot spot of Brazil. *Antimicrob Agents Chemother* 2019;63:e01965-18.  
23  
24  
25  
26  
27
- 28 24. Itoh M, Negreiros do Valle S, Farias S, *et al.* Efficacy of artemether-lumefantrine for  
29 uncomplicated *Plasmodium falciparum* malaria in Cruzeiro do Sul, Brazil, 2016. *Am J*  
30 *Trop Med Hyg* 2018;98:88-94.  
31  
32  
33  
34
- 35 25. Harris PA, Taylor R, Thielke R, *et al.* Research electronic data capture (REDCap) – A  
36 metadata-driven methodology and workflow process for providing translational research  
37 informatics support. *J Biomed Inform* 2009;42:377-381.  
38  
39  
40  
41  
42
- 43 26. Putaporntip C, Buppan P, Jongwutiwes S. Improved performance with saliva and urine as  
44 alternative DNA sources for malaria diagnosis by mitochondrial DNA-based PCR assays.  
45  
46 *Clin Microbiol Infect* 2011;17:1484-91.  
47  
48  
49
- 50 27. Zimmerman PA, Ferreira MU, Howes RE, Mercereau-Puijalon O. Red blood cell  
51 polymorphism and susceptibility to *Plasmodium vivax*. *Adv Parasitol* 2013;81:27-76.  
52  
53  
54  
55  
56  
57  
58  
59  
60

- 1  
2  
3 28. Marcsisin SR, Reichard G, Pybus BS. Primaquine pharmacology in the context of CYP 2D6  
4  
5 pharmacogenomics: current state of the art. *Pharmacol Ther* 2016;161:1-10.  
6  
7  
8 29. de Oliveira TC, Rodrigues PT, Menezes MJ, *et al.* Genome-wide diversity and differentiation  
9  
10 in New World populations of the human malaria parasite *Plasmodium vivax*. *PLoS Negl*  
11  
12 *Trop Dis* 2017;11:e0005824.  
13  
14  
15 30. Daher A, Silva JCAL, Stevens A, *et al.* Evaluation of *Plasmodium vivax* malaria recurrence  
16  
17 in Brazil. *Malar J* 2019;18:18.  
18  
19  
20 31. dos Reis IC, Codeço CT, Degener CM, *et al.* Contribution of fish farming ponds to the  
21  
22 production of immature *Anopheles* spp. in a malaria-endemic Amazonian town. *Malar J*  
23  
24 2015;14:452.  
25  
26  
27  
28 32. Johansen IC, Rodrigues PT, Ferreira MU. Human mobility and urban malaria risk in the  
29  
30 main transmission hotspot of Amazonian Brazil. *PLoS One* 2020; 15:e0242357.  
31  
32  
33 33. de Oliveira TC, Corder RM, Early A, *et al.* Population genomics reveals the expansion of  
34  
35 highly inbred *Plasmodium vivax* lineages in the main malaria hotspot of Brazil. *PLoS*  
36  
37 *Negl Trop Dis* 2020;14:e0008808.  
38  
39  
40  
41 34. Salla LC, Rodrigues PT, Corder RM, *et al.* Molecular evidence of sustained urban malaria  
42  
43 transmission in Amazonian Brazil, 2014-2015. *Epidemiol Infect* 2020;148:e47.  
44  
45  
46 35. Maheu-Giroux M, Casapia M, Sotto-Calle VE, *et al.* Risk of malaria transmission from fish  
47  
48 ponds in the Peruvian Amazon. *Acta Trop* 2010; 115:112-118.  
49  
50  
51 36. Barros FS, Honório NA. Deforestation and malaria on the Amazon frontier: larval clustering  
52  
53 of *Anopheles darlingi* (Diptera: Culicidae) determines focal distribution of malaria. *Am J*  
54  
55 *Trop Med Hyg* 2015;93:939-953.  
56  
57  
58  
59  
60



- 1  
2  
3 37. Martins LMO, David MR, Maciel-de-Freitas R, Silva-do-Nascimento TF. Diversity of  
4  
5 Anopheles mosquitoes from four landscapes in the highest endemic region of malaria  
6  
7 transmission in Brazil. *J Vector Ecol* 2018;43:235–244.  
8  
9  
10 38. Castro MC, Baeza A, Codeço CT, *et al.* Development, environmental degradation, and  
11  
12 disease spread in the Brazilian Amazon. *PLoS Biol* 2019;17:e3000526.  
13  
14  
15  
16  
17  
18  
19  
20  
21  
22  
23  
24  
25  
26  
27  
28  
29  
30  
31  
32  
33  
34  
35  
36  
37  
38  
39  
40  
41  
42  
43  
44  
45  
46  
47  
48  
49  
50  
51  
52  
53  
54  
55  
56  
57  
58  
59  
60

1  
2  
3 **Figure legend.**  
4  
5  
6  
7

8  
9 Figure 1. Participant flowchart of the Mâncio Lima cohort study of urban malaria.  
10  
11  
12  
13  
14  
15  
16  
17  
18  
19  
20  
21  
22  
23  
24  
25  
26  
27  
28  
29  
30  
31  
32  
33  
34  
35  
36  
37  
38  
39  
40  
41  
42  
43  
44  
45  
46  
47  
48  
49  
50  
51  
52  
53  
54  
55  
56  
57  
58  
59  
60

Table 1. Data collected for the Mâncio Lima cohort study of urban malaria

| Measures                   | Description                                                                                                                                                                |
|----------------------------|----------------------------------------------------------------------------------------------------------------------------------------------------------------------------|
| <b>Questionnaire data</b>  |                                                                                                                                                                            |
| Demographic                | Age; sex; pregnancy status; birthplace (municipality, state, and if rural or urban); literacy; second residence outside the urban area (no/yes and where)                  |
| Socioeconomic              | Housing characteristics and ownership of assets; beneficiary of social programs (social security pension, conditional cash transfer program)                               |
| Occupational               | Individual work status; head of the household work status (does not work; formal employee; informal employee; employer)                                                    |
| Behavioral                 | Regular fishing (no/yes); sleeping by the river (no/yes); sleeps with open or closed window (no/yes); time that go to bed and wake up; bathing inside or outside the house |
| Clinical                   | Laboratory-diagnosed malaria since the last follow-up visit (how many positive diagnosis and parasite species); malaria symptoms in the 7 days prior to the interview      |
| Travel history             | Overnight trip outside the town since the last follow-up visit (no/yes, place most visited and duration)                                                                   |
| <b>Laboratory data</b>     |                                                                                                                                                                            |
| Malaria microscopy         | Giemsa-stained thick smears                                                                                                                                                |
| Malaria RDT                | QuickProfile Pf/Pv immunochromatographic test (LumiQuick, Santa Clara, USA).                                                                                               |
| Malaria PCR                | Genus-specific quantitative PCR protocol that targets the mitochondrial genome followed by species-specific amplification                                                  |
| Duffy/DARC genotyping      | TaqMan assays (Applied Biosystems, Foster City, USA) to genotype rs2814778 and rs12075                                                                                     |
| CYP2D6 genotyping          | TaqMan assays (Applied Biosystems) to genotype 12 CYP2D6 single nucleotide polymorphisms and quantify <i>CYP2D6</i> gene copy number                                       |
| SARS-CoV-2 antibodies      | ELISA for IgG antibodies to the subdomain S1 of the SARS-CoV-2 spike protein (Euroimmun, Lübeck, Germany)                                                                  |
| Parasite genome sequencing | Whole-genome sequencing on an Illumina NovaSeq next-generation sequencer                                                                                                   |
| Parasite phenotypes        | Ex-vivo assays of drug sensitivity and red blood cell invasion                                                                                                             |

Table 2. Timeline of measurements for the Mâncio Lima cohort study of urban malaria

| Variables                                | Census survey<br>(Nov 15-Apr<br>16) | Visit 1<br>(Mar-Apr 18) | Visit 2<br>(Oct-Nov 18) | Visit 3<br>(Apr-May 19) | Visit 4<br>(Oct-Nov 19) | Visit 5<br>(Oct-Nov 20) |
|------------------------------------------|-------------------------------------|-------------------------|-------------------------|-------------------------|-------------------------|-------------------------|
| <b>Questionnaire data</b>                |                                     |                         |                         |                         |                         |                         |
| No. participants interviewed             | 9,124                               | 1,394                   | 2,009                   | 2,017                   | 2,130                   | 2,074                   |
| Demographic                              | √                                   | √                       | √                       | √                       | √                       | √                       |
| Socioeconomic                            | √                                   | √                       | √                       | √                       | √                       | √                       |
| Occupational                             |                                     | √                       | √                       | √                       | √                       | √                       |
| Behavioral                               |                                     | √                       | √                       | √                       | √                       | √                       |
| Clinical                                 |                                     | √                       | √                       | √                       | √                       | √                       |
| Travel history                           |                                     |                         |                         | √                       | √                       | √                       |
| <b>Laboratory data</b>                   |                                     |                         |                         |                         |                         |                         |
| No. blood samples collected <sup>a</sup> |                                     | 1,082                   | 1,696                   | 1,578                   | 1,768                   | 1,677                   |
| Malaria microscopy                       |                                     | √                       | √                       | √                       | √                       | √                       |
| Malaria RDT                              |                                     |                         | √                       | √                       | √                       | √                       |
| Malaria PCR                              |                                     |                         | √                       | √                       | √                       | √                       |
| Duffy/DARC genotyping                    |                                     | √                       | √                       | √                       | √                       | √                       |

1  
2  
3  
4  
5  
6  
7  
8  
9  
10  
11  
12  
13  
14  
15  
16  
17  
18  
19  
20  
21  
22  
23  
24  
25  
26  
27  
28  
29  
30  
31  
32  
33  
34  
35  
36  
37  
38  
39  
40  
41  
42  
43  
44  
45  
46  
47

|                                                          |   |   |   |   |   |
|----------------------------------------------------------|---|---|---|---|---|
| CYP2D6 genotyping                                        | √ | √ | √ | √ | √ |
| SARS-CoV-2 antibodies                                    |   |   |   |   | √ |
| Malaria parasite sequencing and phenotyping <sup>b</sup> | √ | √ | √ | √ | √ |

√ denotes that the measurement has been made at the noted study visit.

<sup>a</sup>Finger-prick capillary blood samples collected for malaria diagnosis were used for human genetic and SARS-CoV-2 studies

<sup>b</sup>Venous blood samples were collected from consenting study participants with laboratory-confirmed malaria and leukocyte-depleted for whole-genome sequencing and ex-vivo phenotypic assays.

Peer review only

**Table 3.** Number of malarial infections diagnosed by rapid diagnostic test (RDT) and conventional microscopy, according to the presence of malaria-related symptoms, during 5 consecutive cross-sectional surveys in the Mâncio Lima, cohort (2018-2020).

| Symptoms       | Species              | Study visit |            |       |            |       |            |       |            |       |            |
|----------------|----------------------|-------------|------------|-------|------------|-------|------------|-------|------------|-------|------------|
|                |                      | 1           |            | 2     |            | 3     |            | 4     |            | 5     |            |
|                |                      | RDT         | Microscopy | RDT   | Microscopy | RDT   | Microscopy | RDT   | Microscopy | RDT   | Microscopy |
| Yes            | <i>P. falciparum</i> | -           | 3          | 4     | 0          | 0     | 3          | 1     | 1          | 0     | 0          |
|                | <i>P. vivax</i>      | -           | 2          | 4     | 8          | 2     | 4          | 0     | 0          | 0     | 2          |
|                | Mixed                | -           | 0          | 0     | 0          | 1     | 0          | 0     | 0          | 0     | 0          |
|                | No. tested           | -           | 218        | 307   | 308        | 182   | 182        | 205   | 205        | 137   | 137        |
| No             | <i>P. falciparum</i> | -           | 5          | 4     | 3          | 3     | 3          | 3     | 1          | 0     | 1          |
|                | <i>P. vivax</i>      | -           | 12         | 5     | 5          | 2     | 5          | 3     | 3          | 0     | 1          |
|                | Mixed                | -           | 0          | 0     | 0          | 1     | 1          | 0     | 0          | 0     | 0          |
|                | No. tested           | -           | 864        | 1,389 | 1,388      | 1,396 | 1,396      | 1,563 | 1,563      | 1,540 | 1,540      |
| Total          | <i>P. falciparum</i> | -           | 8          | 8     | 3          | 3     | 6          | 4     | 2          | 0     | 1          |
|                | <i>P. vivax</i>      | -           | 14         | 9     | 13         | 4     | 9          | 3     | 3          | 0     | 3          |
|                | Mixed                | -           | 0          | 0     | 0          | 2     | 1          | 0     | 0          | 0     | 0          |
|                | No. tested           | -           | 1,082      | 1,696 | 1,696      | 1,578 | 1,578      | 1,768 | 1,768      | 1,677 | 1,677      |
| Prevalence (%) | <i>P. falciparum</i> | -           | 0.6        | 0.4   | 0.1        | 0.1   | 0.3        | 0.2   | 0.1        | 0.0   | 0.0        |
|                | <i>P. vivax</i>      | -           | 1.0        | 0.4   | 0.6        | 0.2   | 0.4        | 0.1   | 0.1        | 0.0   | 0.1        |
|                | Mixed                | -           | 0.0        | 0.0   | 0.0        | 0.1   | 0.0        | 0.0   | 0.0        | 0.0   | 0.0        |

Dates of study visits: 1, April-May, 2018; 2, September-October, 2018; 3, May-June, 2019; 4, September-October, 2019; and 5, October-November, 2020. Symptoms (at least one present within the past two weeks): fever, chills, sweating, headache, nausea, vomiting, myalgia, and arthralgia.

1  
2  
3  
4  
5  
6  
7  
8  
9  
10  
11  
12  
13  
14  
15  
16  
17  
18  
19  
20  
21  
22  
23  
24  
25  
26  
27  
28  
29  
30  
31  
32  
33  
34  
35  
36  
37  
38  
39  
40  
41  
42  
43  
44  
45  
46  
47

For peer review only

1  
2  
3  
4  
5  
6  
7  
8  
9  
10  
11  
12  
13  
14  
15  
16  
17  
18  
19  
20  
21  
22  
23  
24  
25  
26  
27  
28  
29  
30  
31  
32  
33  
34  
35  
36  
37  
38  
39  
40  
41  
42  
43  
44  
45  
46  
47  
48  
49  
50  
51  
52  
53  
54  
55  
56  
57  
58  
59  
60

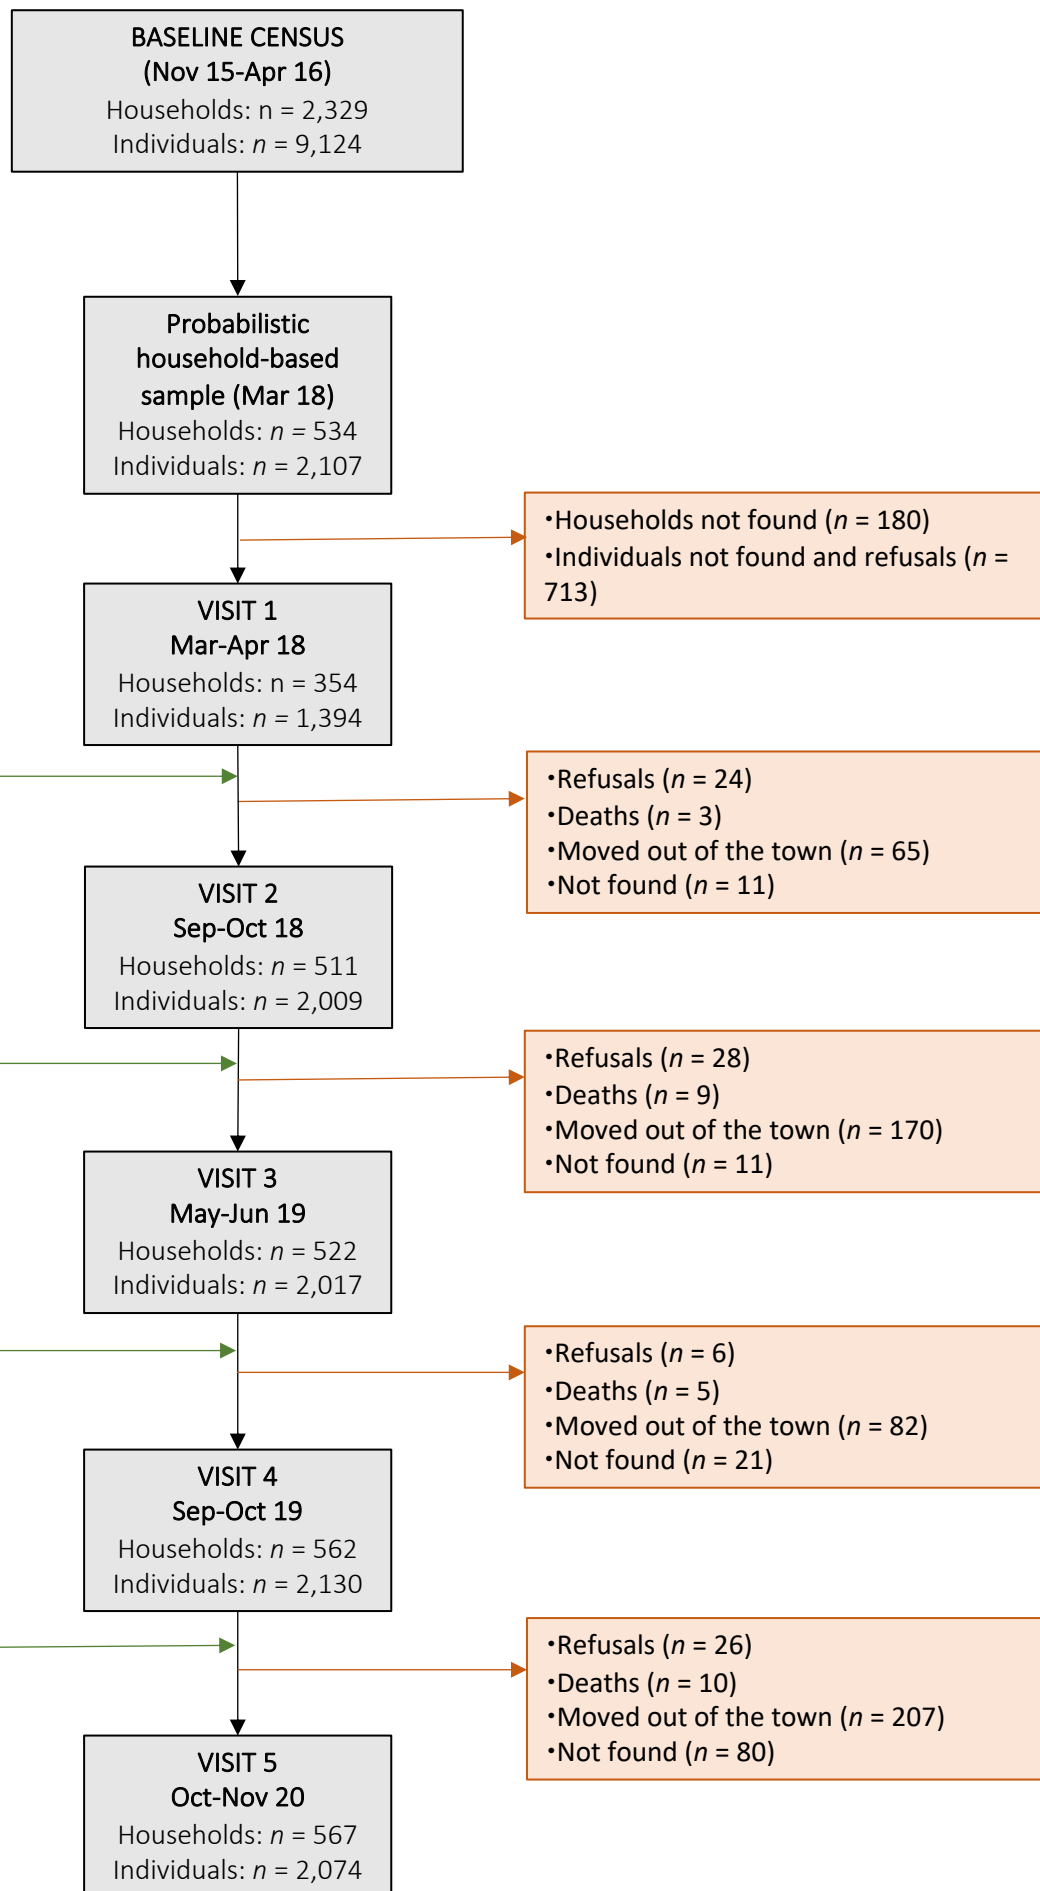



1  
2  
3 Supplemental Material for:  
4  
5  
6  
7

8 Cohort profile: The Mâncio Lima cohort study of urban malaria in Amazonian  
9 Brazil  
10

11 Igor C Johansen,<sup>1\*</sup> Priscila T Rodrigues,<sup>1\*</sup> Juliana Tonini,<sup>1</sup> Joseph M Vinetz,<sup>2</sup> Marcia C Castro,<sup>3</sup>  
12 Marcelo U Ferreira<sup>1</sup>  
13  
14

15 <sup>1</sup>Department of Parasitology, Institute of Biomedical Sciences, University of São Paulo, São  
16 Paulo, SP, Brazil.  
17

18 <sup>2</sup>Section of Infectious Diseases, Department of Internal Medicine, Yale School of Medicine New  
19 Haven, CT, USA.  
20  
21

22 <sup>3</sup>Department of Global Health and Population, Harvard University T H Chan School of Public  
23 Health, Boston, MA, USA.  
24  
25  
26  
27  
28  
29  
30  
31  
32  
33  
34  
35  
36  
37  
38  
39  
40  
41  
42  
43  
44  
45  
46  
47  
48  
49  
50  
51  
52  
53  
54  
55  
56  
57  
58  
59  
60

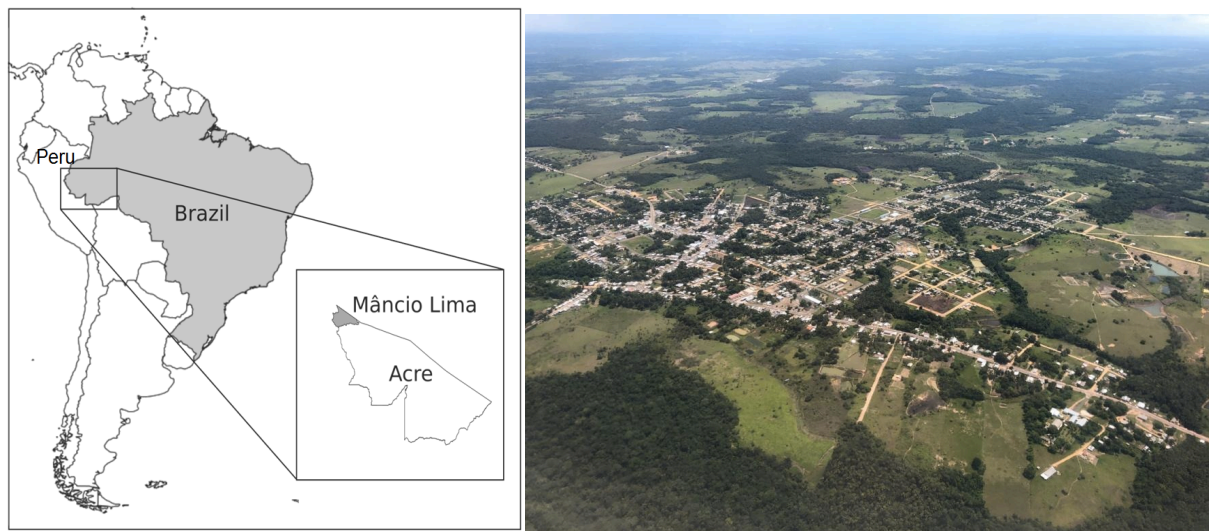

**Supplemental Fig. 1. Study Site.** The left panel shows the location of the Municipality of Mâncio Lima, in northwestern Brazil, next to the border with Peru. The right panel shows an aerial photography of the town of Mâncio Lima. (Photography by Rodrigo M. Corder.)

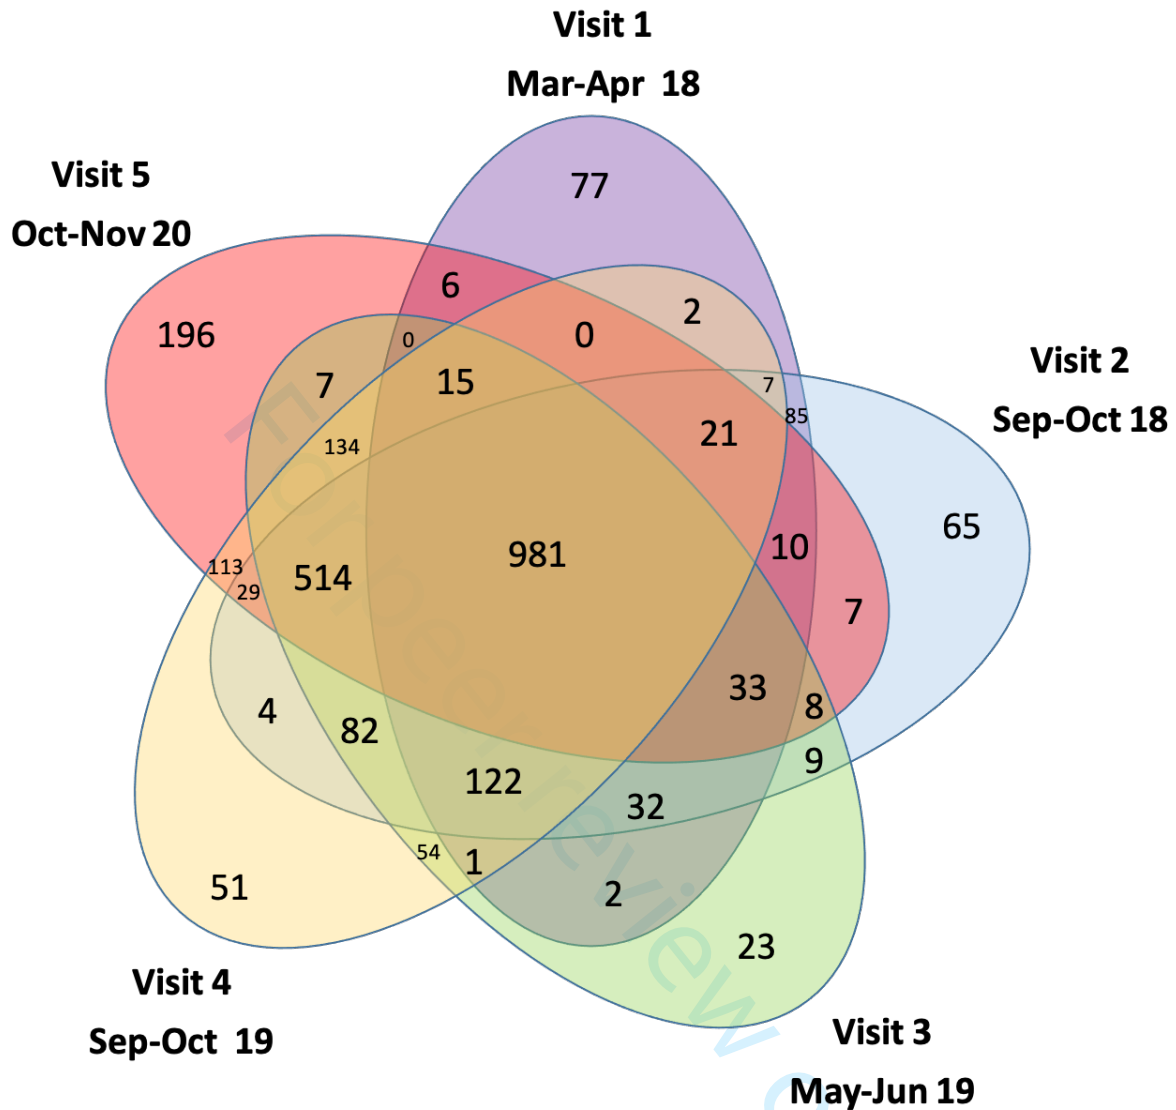

**Supplemental Fig. 2. Participants in consecutive study visits.** The Venn diagram shows the number of individuals interviewed in each study visit and in different combinations of them. Note that 981 individuals participated in all study visits.

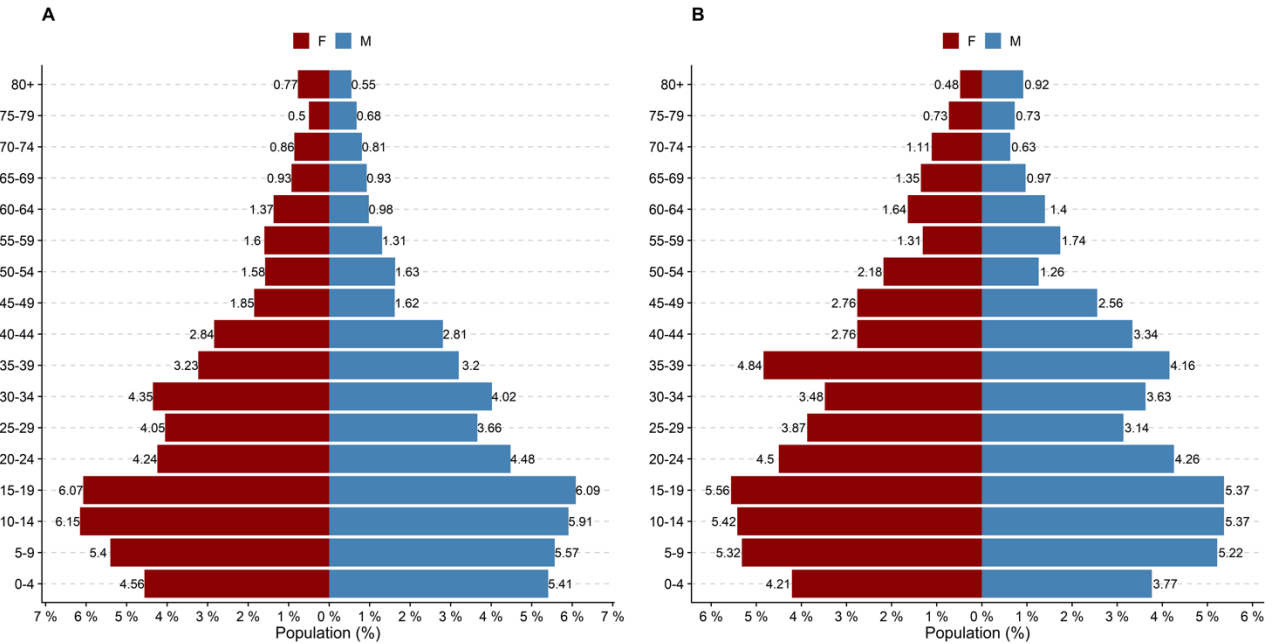

**Supplemental Fig. 3. Representativeness of the study population according to sex and age groups.** Compared with the total population of Mâncio Lima enumerated during the baseline census carried out between November 2015 and April 2016 (A), the study sample has a very similar distribution according to sex and age groups (B).

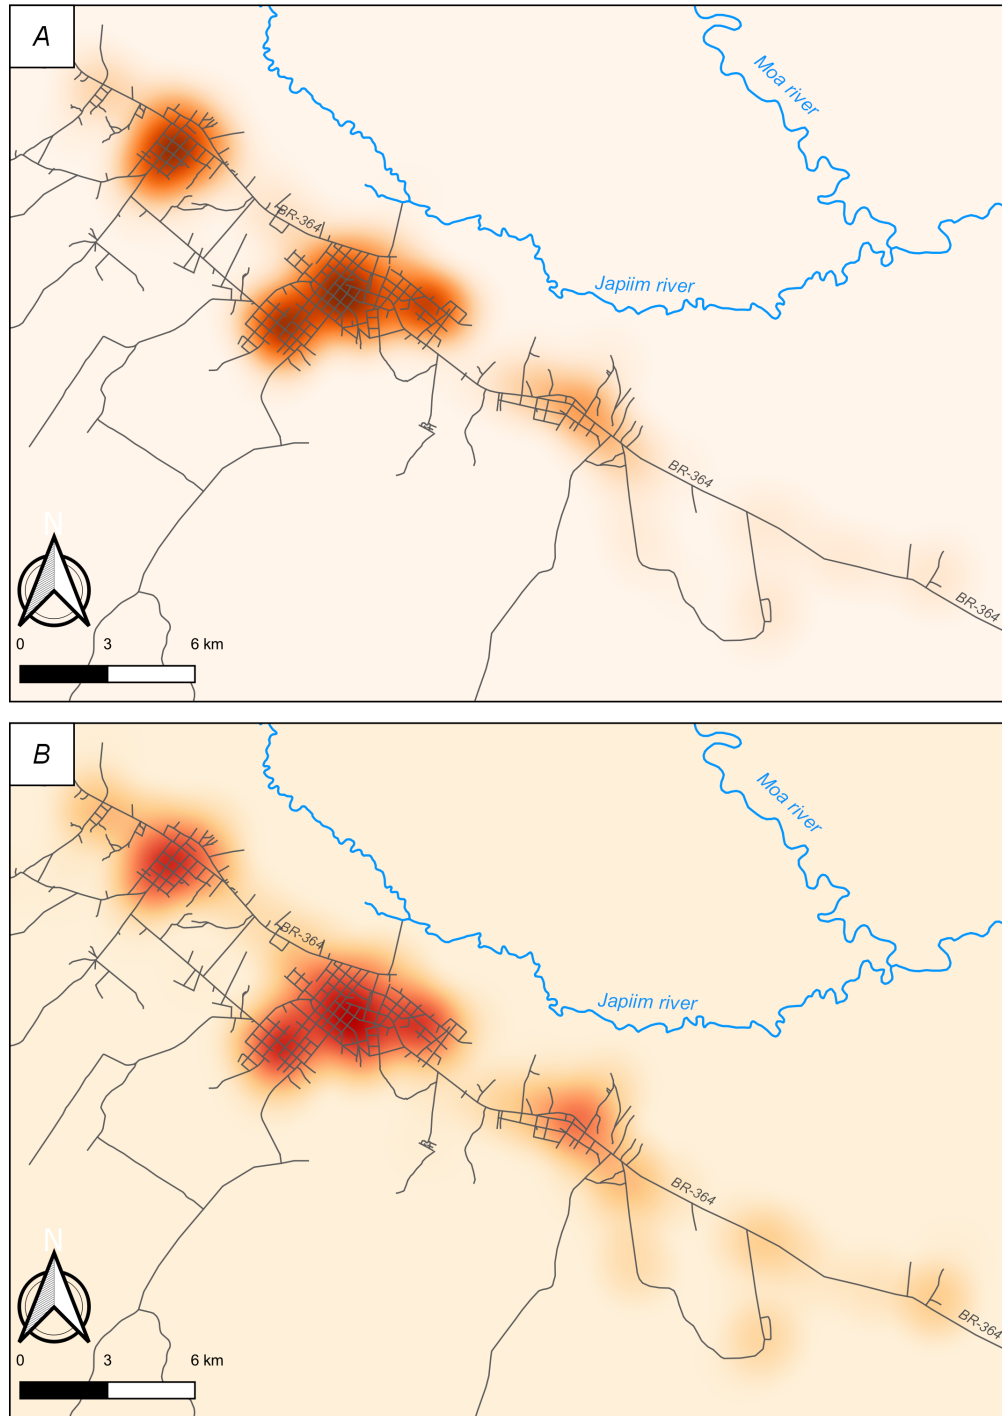

**Supplemental Fig. 4. Representativeness of the study population according to place of residence.** Compared with the total population of Mâncio Lima enumerated during the baseline census carried out between November 2015 and April 2016 (A), the study sample has a nearly equal distribution according to place of residence (B).

1  
2  
3 **Supplemental Table 1. Short videos about the Mâncio Lima cohort study**  
4  
5

| Access                                                                                                | Topic                                      | Producer                    |
|-------------------------------------------------------------------------------------------------------|--------------------------------------------|-----------------------------|
| <a href="https://youtu.be/oEwJPHiBNmc">https://youtu.be/oEwJPHiBNmc</a>                               | Field study set-up, March 2018             | TV USP                      |
| <a href="https://www.youtube.com/watch?v=CBx7z0ApznI">https://www.youtube.com/watch?v=CBx7z0ApznI</a> | House-to-house visits, March 2018          | TV USP                      |
| <a href="https://youtu.be/wE3gJfdRpVo">https://youtu.be/wE3gJfdRpVo</a>                               | Impact of COVID-19 on malaria, August 2020 | Agência FAPESP <sup>a</sup> |

15  
16 <sup>a</sup>Five short videos on COVID-19 research in the field site were produced; a teaser can be found at:

17 [https://www.youtube.com/watch?v=lg1Ug-T\\_whQ&list=PLPdNbZy8nStgk8tZiXn7M7E9EeWXQ2zl9&index=1](https://www.youtube.com/watch?v=lg1Ug-T_whQ&list=PLPdNbZy8nStgk8tZiXn7M7E9EeWXQ2zl9&index=1).  
18  
19  
20  
21  
22  
23  
24  
25  
26  
27  
28  
29  
30  
31  
32  
33  
34  
35  
36  
37  
38  
39  
40  
41  
42  
43  
44  
45  
46  
47

# BMJ Open

## Cohort profile: The Mâncio Lima cohort study of urban malaria in Amazonian Brazil

|                                 |                                                                                                                                                                                                                                                                                                                                                                                  |
|---------------------------------|----------------------------------------------------------------------------------------------------------------------------------------------------------------------------------------------------------------------------------------------------------------------------------------------------------------------------------------------------------------------------------|
| Journal:                        | <i>BMJ Open</i>                                                                                                                                                                                                                                                                                                                                                                  |
| Manuscript ID                   | bmjopen-2020-048073.R1                                                                                                                                                                                                                                                                                                                                                           |
| Article Type:                   | Cohort profile                                                                                                                                                                                                                                                                                                                                                                   |
| Date Submitted by the Author:   | 25-Aug-2021                                                                                                                                                                                                                                                                                                                                                                      |
| Complete List of Authors:       | Johansen, Igor; University of Sao Paulo, Parasitology<br>Rodrigues, Priscila; University of Sao Paulo, Parasitology<br>Tonini, Juliana; University of Sao Paulo, Parasitology<br>Vinetz, Joseph; Yale University School of Medicine<br>Castro, Marcia; Harvard School of Public Health, Global Health and Population<br>Ferreira, Marcelo; University of Sao Paulo, Parasitology |
| <b>Primary Subject Heading</b>: | Epidemiology                                                                                                                                                                                                                                                                                                                                                                     |
| Secondary Subject Heading:      | Infectious diseases                                                                                                                                                                                                                                                                                                                                                              |
| Keywords:                       | Epidemiology < TROPICAL MEDICINE, PARASITOLOGY, Epidemiology < INFECTIOUS DISEASES                                                                                                                                                                                                                                                                                               |
|                                 |                                                                                                                                                                                                                                                                                                                                                                                  |

SCHOLARONE™  
Manuscripts

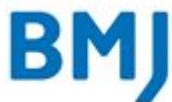

I, the Submitting Author has the right to grant and does grant on behalf of all authors of the Work (as defined in the below author licence), an exclusive licence and/or a non-exclusive licence for contributions from authors who are: i) UK Crown employees; ii) where BMJ has agreed a CC-BY licence shall apply, and/or iii) in accordance with the terms applicable for US Federal Government officers or employees acting as part of their official duties; on a worldwide, perpetual, irrevocable, royalty-free basis to BMJ Publishing Group Ltd ("BMJ") its licensees and where the relevant Journal is co-owned by BMJ to the co-owners of the Journal, to publish the Work in this journal and any other BMJ products and to exploit all rights, as set out in our [licence](#).

The Submitting Author accepts and understands that any supply made under these terms is made by BMJ to the Submitting Author unless you are acting as an employee on behalf of your employer or a postgraduate student of an affiliated institution which is paying any applicable article publishing charge ("APC") for Open Access articles. Where the Submitting Author wishes to make the Work available on an Open Access basis (and intends to pay the relevant APC), the terms of reuse of such Open Access shall be governed by a Creative Commons licence – details of these licences and which [Creative Commons](#) licence will apply to this Work are set out in our licence referred to above.

Other than as permitted in any relevant BMJ Author's Self Archiving Policies, I confirm this Work has not been accepted for publication elsewhere, is not being considered for publication elsewhere and does not duplicate material already published. I confirm all authors consent to publication of this Work and authorise the granting of this licence.



1  
2  
3 Cohort profile: The Mâncio Lima cohort study of urban malaria in Amazonian  
4  
5  
6 Brazil  
7  
8  
9

10 Igor C Johansen,<sup>1\*</sup> Priscila T Rodrigues,<sup>1\*</sup> Juliana Tonini,<sup>1</sup> Joseph M Vinetz,<sup>2</sup> Marcia C Castro,<sup>3</sup>  
11  
12  
13 Marcelo U Ferreira<sup>1</sup>  
14  
15

16  
17  
18 <sup>1</sup>Department of Parasitology, Institute of Biomedical Sciences, University of São Paulo, São  
19  
20 Paulo, SP, Brazil.  
21

22 <sup>2</sup>Section of Infectious Diseases, Department of Internal Medicine, Yale School of Medicine New  
23  
24 Haven, CT, USA.  
25

26  
27 <sup>3</sup>Department of Global Health and Population, Harvard T H Chan School of Public Health,  
28  
29 Boston, MA, USA.  
30

31  
32  
33  
34 \*These authors contributed equally to this work.  
35

36 Correspondence to: Dr Marcelo U Ferreira, Department of Parasitology, Institute of Biomedical  
37  
38 Sciences, University of São Paulo, Av. Prof. Lineu Prestes 1374, 05508-900 São Paulo, SP,  
39  
40 Brazil. Tel. +55-11-30917746. E-mail: mufferrei@usp.br  
41  
42  
43  
44

45 Word count (main text): 2,623  
46  
47  
48  
49  
50  
51  
52  
53  
54  
55  
56  
57  
58  
59  
60

## ABSTRACT

**Purpose** This population-based open cohort study aims to investigate biological and sociodemographic drivers of malaria transmission in the main urban hotspot of Amazonian Brazil.

**Participants** Nearly 20% of the households in the northwestern town of Mâncio Lima were randomly selected and 2,690 participants were enrolled since April 2018. Sociodemographic, housing quality, occupational, behavioral, and morbidity information and travel histories were collected during consecutive study visits. Blood samples from participants >3 months old were used for malaria diagnosis and human genetic studies; samples from participants with laboratory-confirmed malaria have been cryopreserved for genetic and phenotypic characterization of parasites. Serology was introduced in 2020 to measure the prevalence and longevity of SARS-CoV-2 IgG antibodies.

**Findings to date** Malaria prevalence rates were low (up to 1.0% for *P. vivax* and 0.6% for *P. falciparum*) during 5 consecutive cross-sectional surveys between April-May 2018 and October-November 2020; 63% of infections diagnosed by microscopy were asymptomatic. Malaria risk is heterogeneously distributed, with 20% study participants contributing 86% of the overall burden of *P. vivax* infection. Adult males are at greatest risk of infection and human mobility across the urban-rural interface may contribute to sustained malaria transmission. Local *P. vivax* parasites are genetically diverse and fragmented into discrete inbred lineages that remain stable across space and time.

1  
2  
3  
4  
5 **Future plans** Two follow-up visits, with similar study protocols, are planned in 2021. We aim to  
6 identify high-risk individuals that fuel onwards malaria transmission and represent a priority  
7 target for more intensive and effective control interventions.  
8  
9  
10  
11  
12

13  
14 **Registration** ClinicalTrials.gov (NCT03689036).  
15  
16

17  
18  
19 Abstract word count: 249  
20  
21  
22

23  
24 **Key words** malaria; Amazon; epidemiology; risk factors; SARS-CoV-2 antibodies  
25  
26  
27  
28  
29  
30  
31  
32  
33  
34  
35  
36  
37  
38  
39  
40  
41  
42  
43  
44  
45  
46  
47  
48  
49  
50  
51  
52  
53  
54  
55  
56  
57  
58  
59  
60

### Strengths and limitations of this study

► This is the first population-based cohort study to address the emerging risk of malaria transmission in urbanized spaces in the Amazon.

► Nearly 20% of the households in town of Mâncio Lima, the main urban malaria hotspot in Brazil, were randomly drawn from census listings and 2,690 participants were enrolled and followed-up since April 2018.

► Sociodemographic, occupational, behavioral, and morbidity information, travel histories, and capillary blood samples were collected during five study visits; venous blood from confirmed malaria infections have been cryopreserved for genetic/genomic and phenotypic parasite characterization.

► Main potential limitations include: (a) generalizability of the study results since the cohort population comprises residents in a single malaria hotspot in the Amazon; (b) loss to follow-up due to the high mobility of the target population; and (c) risk of recall bias during interviews.

## INTRODUCTION

Although local malaria transmission has decreased substantially over the past two decades, 120 million people continue to have some risk of infection in Latin America and the Caribbean.<sup>1</sup> The Amazon Basin accounts for approximately 90% of the malaria cases in the Americas; 72% of them are due to *Plasmodium vivax*. Rural communities such as riverine villages, frontier farming settlements, gold mining enclaves, and Amerindian reserves are disproportionately affected.<sup>2</sup>

Despite the low force of infection found across the Amazon, nearly one order of magnitude lower than that in rural Africa,<sup>3</sup> a minority of highly exposed individuals develops clinical immunity to malaria following infection and eventually constitutes a substantial infectious reservoir comprised of asymptomatic parasite carriers that are overlooked by routine surveillance.<sup>3-8</sup> Importantly, blood from asymptomatic *P. vivax* carriers can infect local malaria vectors despite low mean parasite density.<sup>9</sup>

The Amazon has experienced an accelerated urban growth, characterized by massive rural-to-urban migration, unplanned housing, and inadequate infrastructure, that challenges its conventional representation as a densely forested territory interspersed by small and isolated human settlements.<sup>10</sup> Urban residents now account for 72.5% of the population of the Amazon Basin of Brazil and almost 20% of the 24.4 million Amazonian live in cities with >500,000 inhabitants.<sup>11</sup> Importantly, malaria transmission has been increasingly documented within and near densely populated urban centers of the Amazon,<sup>12-14</sup> with occasional large outbreaks in cities.<sup>15</sup> We hypothesize that asymptomatic carriers continuously move malaria parasites across

1  
2  
3 the urban-rural interface and contribute significantly to outbreaks and sustained malaria  
4  
5 transmission in urbanized spaces in the region.<sup>16</sup>  
6  
7  
8  
9

10 The dynamics, determinants, and public health consequences of urban malaria remain largely  
11 unexplored as cities and towns grow and proliferate in the Amazon. This population-based open  
12 cohort study was set up to investigate a wide range of biological and sociodemographic factors  
13  
14 that drive malaria endemicity in the main urban transmission hotspot of Amazonian Brazil. The  
15  
16 long-term goal is to provide scientific evidence that can be translated into effective public health  
17  
18 interventions for malaria control and elimination. The original study has since expanded to  
19  
20 include SARS-CoV-2 IgG antibody measurements during the ongoing COVID-19 pandemic in  
21  
22 this hard-hit region and investigate possible interactions between dengue and COVID-19.<sup>17</sup>  
23  
24  
25  
26  
27  
28  
29

## 30 **COHORT DESCRIPTION**

### 31 **Study site**

32  
33  
34  
35  
36  
37 The Mâncio Lima cohort study aims to investigate malaria epidemiology, diagnostics,  
38  
39 transmission dynamics, and clinical pathogenesis in Amazonian Brazil. The study site, the town  
40  
41 of Mâncio Lima (07°36'51"S, 72°53'45"W), is situated in the upper Juruá Valley region of Acre  
42  
43 State, westernmost Brazil, close to the border with Peru (Supplemental Fig. 1). Because urban  
44  
45 areas in Brazil are defined according to relatively arbitrary administrative rules that do not  
46  
47 necessarily consider population density and other internationally adopted criteria,<sup>18</sup> we  
48  
49 delimited the town of Mâncio Lima essentially as done by the Brazilian Institute of Geography  
50  
51 and Statistics (IBGE) but extended the urban area to two urbanized neighborhoods (Iracema and  
52  
53  
54  
55  
56  
57  
58  
59  
60

1  
2  
3 Pé da Terra) situated along the main road that crosses the town, following “urbanicity” criteria  
4 developed for use in this setting.<sup>19</sup> At the time of the study onset, the municipality of Mâncio  
5 Lima had an annual parasite incidence (API; number of new laboratory-confirmed malaria cases  
6 per 1,000 people per year) estimated at 422.8, the highest for a municipality in Brazil.<sup>20</sup> With a  
7 typical equatorial humid climate, the area receives most rainfall between November and April,  
8 but malaria transmission occurs year-round. *Plasmodium vivax* accounts for 84% of local malaria  
9 cases and *P. falciparum* for 14%; <2% are coinfections with both species.<sup>21</sup> *P. vivax* infections  
10 are routinely treated with chloroquine (total dose, 25 mg of base/kg over 3 days) and primaquine  
11 (0.5 mg of base/kg/day for 7 days) and *P. falciparum* infections are treated with a fixed-dose  
12 combination of artemether (2-4 mg/kg/day) and lumefantrine (12-24 mg/kg/day) for 3 days.<sup>22</sup>  
13  
14 Both treatment regimens remain highly efficacious in this area.<sup>23,24</sup>  
15  
16  
17  
18  
19  
20  
21  
22  
23  
24  
25  
26  
27  
28  
29  
30

### 31 **Study population**

32  
33 A baseline population census was conducted in Mâncio Lima between November 2015 and April  
34 2016. We enumerated 9,124 permanent residents in the urban area, with ages ranging between  
35 <1 month and 105 years, distributed into 2,329 households.<sup>21</sup> The cohort study sample comprises  
36 all members of randomly chosen urban households in Mâncio Lima. We used simple probability  
37 sampling to draw 534 households from the list of those enumerated during the baseline census  
38 survey. We allowed for up to 2.9% non-localized or empty houses and refusals and aimed to  
39 enroll at least 20% of all households in the town. Because the target sample size was not reached  
40 during the baseline visit, we used a list of randomly chosen substitute households during the  
41 second visit to replace households that declined participation or were not located. Because this  
42 cohort study was designed to evaluate a wide range of sociodemographic, clinical, and laboratory  
43  
44  
45  
46  
47  
48  
49  
50  
51  
52  
53  
54  
55  
56  
57  
58  
59  
60

1  
2  
3 exposures in the same population, no formal a-priori sample size and power calculations were  
4  
5 made.  
6  
7  
8  
9

### 10 **Participant recruitment and follow-up**

11  
12 Figure 1 presents the study flowchart. During the first study visit, between April and May 2018,  
13  
14 we targeted the 534 households drawn from the census listings; 1,391 residents from 354  
15  
16 households were located and agreed to participate. To achieve the desired sample size, 147  
17  
18 “substitute” households were randomly selected and approached during the second visit, in  
19  
20 October-November 2018. The ongoing cohort is dynamic and new residents joining the  
21  
22 household (those who moved in or were born between study visits) are enrolled during the  
23  
24 follow-up visits. Study participants leaving the sampled households are retained in the cohort as  
25  
26 long as they can be located by the field team and their new residences, which are labelled as new  
27  
28 households, are situated in the urban area of Mâncio Lima. As a consequence, the total number  
29  
30 of households in the sample has increased since the second visit (Fig. 1). Some study participants  
31  
32 could not be located during a follow-up visit but are later “rescued” during the next visits, as  
33  
34 indicated in Fig. 1; those who die or leave the town are withdrawn. Participants who died, moved  
35  
36 away from the study site, and those who withdrew their consent to participate were considered  
37  
38 lost for follow-up. Five house visits were carried out until November 2020 and two follow-up  
39  
40 visits are planned for 2021. Subject to funding, follow-up will continue after 2021.  
41  
42  
43  
44  
45  
46  
47  
48

49 < Figure 1 >  
50

### 51 **Data and sample collection**

52  
53  
54  
55  
56  
57  
58  
59  
60



1  
2  
3 Structured questionnaires have been applied to study participants during study visits to obtain  
4 and update the demographic, socioeconomic, occupational, behavioral, and morbidity  
5 information listed in Table 1, which indicates which key variables are individual (one value for  
6 each participant) or household-level (the same value attributed to all household members). Dates  
7 of follow-up visits and the number of participants interviewed in each visit are shown in Table 2.  
8 Both individual and household-level information was collected during study visits. For the vast  
9 majority of variables, information is missing for <5% of participants. GPS coordinates were  
10 obtained for all dwellings. Data were entered using tablets programmed with REDCap<sup>25</sup> and  
11 subsequently exported to Stata SE 15.0 (StataCorp, College Station, USA) for statistical analysis.  
12 Because study participants are nested into households, which introduces dependency among  
13 observations, we have been using mixed-effects logistic or Poisson regression models with  
14 random effects at the household level and robust variance for data analysis.  
15  
16  
17  
18  
19  
20  
21  
22  
23  
24  
25  
26  
27  
28  
29

30 < Table 1 >

31 < Table 2 >

32  
33  
34  
35 During each visit, household members older than 3 months are invited to provide a finger-prick  
36 blood sample for on-site malaria diagnosis by microscopy and antigen-based rapid diagnostic  
37 tests. Giemsa-stained thick blood smears have at least 100 fields examined for malaria parasites  
38 under 1000× magnification by experienced local microscopists. Blood aliquots have been stored  
39 at -20°C for extraction of human and parasite DNA. Confirmatory molecular diagnosis of  
40 malaria has been made with a genus-specific quantitative PCR protocol that targets the  
41 mitochondrial genome of human-infecting malaria parasites<sup>26</sup> followed by species-specific tests.  
42 Human genetic studies are underway to identify Duffy blood group polymorphisms that  
43 modulate the ability of *P. vivax* merozoites to invade human red blood cells<sup>27</sup> and analyses of  
44  
45  
46  
47  
48  
49  
50  
51  
52  
53  
54  
55  
56  
57  
58  
59  
60

1  
2  
3 single-nucleotide polymorphisms and copy number variation in the gene encoding the  
4  
5 cytochrome P450 (CYP) enzyme CYP2D6 that affect the metabolization of the antimalarial drug  
6  
7 primaquine.<sup>28</sup> SARS-CoV-2 IgG antibodies were measured by ELISA in samples collected  
8  
9 between October and November 2020; to estimate the longevity of SARS-CoV-2 antibody  
10  
11 responses, seropositive individuals will be retested within 6 and 12 months.  
12  
13

14  
15  
16  
17 Study participants with laboratory-confirmed malaria during the study visits are invited to  
18  
19 contribute a 5 ml venous blood sample for further genetic/genomic and phenotypic  
20  
21 characterization of infecting parasites. Additional samples have been collected between the visits  
22  
23 from consenting malaria patients from Mâncio Lima and surrounding rural sites to map the  
24  
25 circulation of parasite lineages over time across the region. BioR01 Plus leukocyte-depletion  
26  
27 filters (Fresenius Kabi, Bad Homburg, Germany) are used to reduce human DNA contamination  
28  
29 before parasites' genome sequencing.<sup>29</sup>  
30  
31  
32  
33  
34

### 35 **Additional data sources**

36  
37 We have routinely retrieved all malaria case notifications in the study population that were  
38  
39 entered into the electronic malaria notification system of the Ministry of Health of Brazil  
40  
41 (Portuguese acronym, SIVEP-Malaria) since October 2015. Because malaria is a notifiable  
42  
43 disease in Brazil and diagnostic testing and treatment are not available outside the network of  
44  
45 government-run health care facilities, the electronic database comprises the vast majority of  
46  
47 laboratory-confirmed malaria episodes nationwide.<sup>30</sup>  
48  
49  
50  
51  
52  
53  
54  
55  
56  
57  
58  
59  
60

1  
2  
3 Streams, wetlands rich in moriche palm trees, and natural and human-made fish farming ponds  
4 are widespread across the town of Mâncio Lima and serve as breeding habitats for malaria  
5  
6 are widespread across the town of Mâncio Lima and serve as breeding habitats for malaria  
7  
8 vectors.<sup>31</sup> Potential mosquito breeding sites have been mapped and are continuously monitored  
9  
10 for larval density by the local staff of the National Malaria Control Program.  
11  
12  
13

### 14 **Patient and public involvement**

15  
16 Study participants had no role in the design, recruitment and conduct of the study. However, they  
17  
18 have been regularly informed on project objectives and main results by WhatsApp messages,  
19  
20 podcasts, and short videos. Links to some of these videos are provided in Supplemental Table 1.  
21  
22  
23 Local health officers, including National Malaria Control Program personnel, are routinely  
24  
25 briefed on study findings during follow-up visits.  
26  
27  
28  
29

### 30 **FINDINGS TO DATE**

31  
32  
33  
34  
35 The Mâncio Lima cohort study of urban malaria is ongoing. Supplemental Table 2 shows the  
36  
37 sociodemographic characteristics of participants at enrollment. A total of 2,690 residents were  
38  
39 interviewed during at least one follow-up visit and 981 (36.5%) participated in all visits  
40  
41 (Supplemental Fig. 2). Capillary blood was obtained from 77.6-84.4% % of participants in each  
42  
43 visit, with a total of 7,781 samples collected (Table 3). Reasons for not providing blood samples  
44  
45 included age below 3 months and inability or refusal to perform a finger puncture. Compared  
46  
47 with the total population of Mâncio Lima enumerated during the baseline census, the study  
48  
49 sample has a very similar distribution according to sex and age groups (Supplemental Fig. 3) and  
50  
51 place of residence (Supplemental Fig. 4). Overall malaria prevalence rates determined by  
52  
53  
54  
55  
56  
57  
58  
59  
60

1  
2  
3 microscopy during the study visits ranged between 0.1% and 1.0% for *P. vivax* and 0.0% and  
4  
5 0.6% for *P. falciparum*; 39 of 62 (62.9%) infections were asymptomatic within one week prior to  
6  
7 blood collection (Table 3). Ongoing analyses indicate that our PCR protocol detects up to 10  
8  
9 times more malaria infections than microscopy in cohort participants, but further standardization  
10  
11 and validation are in progress.  
12  
13

14  
15 < Table 3 >  
16

17 Analyses published to date combined baseline information with routinely collected malaria  
18  
19 surveillance data. We found a marked heterogeneity in malaria risk in the study population.  
20  
21 Adult males are at greatest risk of infection; poor housing and residence in the less urbanized  
22  
23 periphery of the town are additional predictors of elevated malaria risk.<sup>21</sup> Nearly 14% of the  
24  
25 study participants, mostly young children and the elderly, comprise a very low-risk fraction of  
26  
27 the population who tend to remain uninfected.<sup>21</sup> We used compartmental susceptible-infected-  
28  
29 susceptible transmission models to quantify malaria risk heterogeneity at the community level.  
30  
31 We estimate that 20% of the residents contribute 86% of the overall burden of *P. vivax* infection  
32  
33 in Mâncio Lima.<sup>3</sup> These high-risk individuals eventually develop clinical immunity to malaria  
34  
35 and constitute the asymptomatic infectious reservoir that fuels onwards transmission.  
36  
37  
38  
39  
40  
41

42 To explore the relative contribution of human mobility to malaria in Mâncio Lima, we  
43  
44 investigated patterns and determinants of urban-to-rural mobility, which is mostly work-related  
45  
46 and places travelers at risk of malaria, and rural-to-urban mobility caused by malaria treatment  
47  
48 seeking, which poses an additional risk of infection to urban residents. This information was  
49  
50 retrieved from travel histories collected during follow-up visits. We found that the rural localities  
51  
52 most frequently visited by urban residents are those with the most intense malaria transmission.  
53  
54  
55  
56  
57  
58  
59  
60

1  
2  
3 These are also the most frequent sources of imported malaria cases diagnosed in the town. The  
4 most mobile study participants are unemployed men 16 to 60-years old who maintain both urban  
5 and rural residences.<sup>32</sup>  
6  
7  
8  
9

10  
11  
12 Parasites collected during the study were used to map local and regional transmission pathways  
13 of *P. vivax*. We found high genome-level diversity in the *P. vivax* population of Mâncio Lima,  
14 but parasites were fragmented into discrete inbred lineages that co-circulate in the host  
15 population over extended periods of time.<sup>33</sup> Microsatellite genotyping of local parasites also  
16 revealed the persistence of near-clonal parasite lineages in the town, which have been interpreted  
17 as evidence for sustained local *P. vivax* transmission.<sup>34</sup> We also found significant ancestry  
18 sharing between parasites collected at a distance >700 km, suggesting that *P. vivax* lineages from  
19 the Mâncio Lima hotspot seed regional malaria transmission.<sup>33</sup>  
20  
21  
22  
23  
24  
25  
26  
27  
28  
29  
30

31  
32  
33 We have recently shown that serologically proven prior dengue infection is associated with  
34 increased subsequent risk of clinically apparent COVID-19 in this cohort.<sup>17</sup> Dengue IgG  
35 antibodies were detected in 37.0% of the 1,285 cohort participants tested in October-November,  
36 2019, with 10.4 seroconversion events per 100 person-years over the following 12 months. In  
37 October-November, 2020, 35.2% of the participants tested had anti-SARS-CoV-2 IgG and  
38 57.1% of the 448 SARS-CoV-2 seropositives reported clinical manifestations of COVID-19 at  
39 the time of infection. Participants aged >60 years were twice more likely to have symptomatic  
40 COVID-19 than under-five children. Importantly, prior dengue infection was associated with  
41 twice the risk of clinically apparent COVID-19 upon SARS-CoV-2 infection after adjustment for  
42 identified confounders.<sup>17</sup>  
43  
44  
45  
46  
47  
48  
49  
50  
51  
52  
53  
54  
55  
56  
57  
58  
59  
60

## Strengths and limitations

This is the first population-based cohort study of urban malaria in the Amazon. We combine longitudinally collected data and samples to identify demographic, socioeconomic, occupational, behavioral, and biological contributors to sustained malaria transmission in urbanized spaces that may represent targets for control interventions. Importantly, the prospective study design enables us to discern temporal associations between exposures and the outcomes of interest and to map the spread of parasite lineages over space and time.

Malaria-related outcomes in the study population have been measured in two ways. First, the point prevalence of infection is determined during each follow-up visit. Conventional and molecular diagnostic tests are carried out on all blood samples, that are collected regardless of any current or recent symptom, allowing us to detect submicroscopic and asymptomatic parasite carriage. Second, the incidence of clinical malaria between study visits is estimated from malaria case notifications in the study population. These are essentially symptomatic infections diagnosed by conventional microscopy. The main limitation of routine surveillance data is that blood samples are not available for further confirmatory diagnostic tests. Moreover, although surveillance comprises virtually all malaria episodes diagnosed by microscopy, submicroscopic and asymptomatic malaria episodes experienced by the study population between follow-up visits are overlooked.

1  
2  
3 There has been considerable cohort attrition from initial recruitment to the most recent follow-up  
4 visit, 32 months later. The study population is very mobile and many people are involved in  
5 seasonal work in surrounding rural areas. Study participants, especially those who have a second  
6 residence, often leave the town either temporally or definitively. This may reduce the statistical  
7 power to test for associations between less prevalent exposures and outcomes. New residents in  
8 the study households are continuously enrolled and returning participants are recued, keeping the  
9 total number of participants remarkably stable between visits 2 and 5. However, it remains to be  
10 determined whether, regarding main study exposures, newly arriving and remaining participants  
11 are similarly representative of the target population.  
12  
13  
14  
15  
16  
17  
18  
19  
20  
21  
22

23  
24  
25  
26 Another study limitation is the risk of recall bias during interviews. For example, information  
27 regarding travel, recent mobility and malaria-related symptoms is entirely dependent on  
28 participants' reports. It is difficult to know with any precision how many antecedent episodes of  
29 malaria infection an individual might have had.  
30  
31  
32  
33  
34  
35  
36  
37

38 Finally, the cohort includes residents in a single malaria hotspot in the Amazon, which may  
39 compromise the generalizability of the main results. However, we argue that malaria  
40 transmission is increasingly common in similar urbanized spaces in the Amazon.<sup>12-15</sup> Extensive  
41 deforestation and environmental degradation have displaced vectors to more urbanized areas  
42 across the region, where suitable larval habitats, such as natural water bodies and human-made  
43 fish farming ponds, are now widespread.<sup>13,15,31,35-38</sup>  
44  
45  
46  
47  
48  
49  
50  
51  
52  
53

## 54 **COLLABORATION**

55  
56  
57  
58  
59  
60

1  
2  
3  
4  
5 Datasets from the Mâncio Lima cohort study are not yet openly available, but will be deposited  
6  
7 in the ClinEpiDB (<https://clinepidb.org/ce/app>) repository of population-based epidemiological  
8  
9 studies. A repository database has been organized at the University of São Paulo, where future  
10  
11 published papers will be made available (<https://uspdigital.usp.br/repositorio/>). Researchers who  
12  
13 are interested in potential collaboration should contact the principal investigator, Marcelo U.  
14  
15 Ferreira (muferrei@usp.br), to complete a research plan for evaluation by the Amazonian  
16  
17 International Center of Excellence for Malaria Research steering committee.  
18  
19  
20  
21  
22  
23

24 **Acknowledgments.** The authors thank Ajucilene G. Mota, Francisco Melo and their team at the  
25  
26 Health Secretary of Mâncio Lima for overall logistic support, to Rodrigo M. Corder, Anaclara  
27  
28 Pincelli, Lais C. Salla, Thaís C. de Oliveira, Vanessa C. Nicolete, Amanda Sampaio, and Madson  
29  
30 L. de Oliveira for fieldwork, and Maria José Menezes for her excellent administrative support.  
31  
32  
33  
34

35 **Contributors.** M.U.F., J.M.V. and M.C.C. planned the cohort. M.U.F., P.T.R. and I.C.J.  
36  
37 coordinated the fieldwork, with the help of J.T. I.C.J., M.U.F. and M.C.C. supervised data  
38  
39 management and analysis. I.C.J. and M.U.F. wrote the first manuscript draft with input from all  
40  
41 authors, who have read and approved the final version of the manuscript.  
42  
43  
44  
45  
46

47 **Funding.** The Mâncio Lima cohort study is part of the National Institutes of Health (NIH)-  
48  
49 funded Amazonian International Center of Excellence for Malaria Research network  
50  
51 ([https://www.niaid.nih.gov/research/amazonian-international-center-excellence-malaria-](https://www.niaid.nih.gov/research/amazonian-international-center-excellence-malaria-research)  
52  
53 [research](https://www.niaid.nih.gov/research/amazonian-international-center-excellence-malaria-research)) funded by the National Institutes of Health (NIH), United States (Amazonian  
54  
55  
56  
57  
58  
59  
60



1  
2  
3 International Center of Excellence for Malaria Research, U19 AI089681 to J.M.V.), which also  
4 provides a post-doctoral fellowship to I.C.J., and by the Fundação de Amparo à Pesquisa do  
5 Estado de São Paulo (FAPESP), Brazil (2016/18740-9, 2020/03611-4, and 2020/04505-3 to  
6 M.U.F.). P.T.R. receives a scholarship from FAPESP; M.U.F. and R.M.C. receive research  
7 scholarships from Conselho Nacional de Desenvolvimento Científico e Tecnológico (CNPq),  
8 Brazil (301011/2019-2). The funders had no role in study design, data collection and  
9 interpretation, or the decision to submit the work for publication.  
10  
11  
12  
13  
14  
15  
16  
17  
18  
19  
20

21 **Competing interests.** None declared.  
22  
23  
24  
25

26 **Patient consent for publication.** Not required.  
27  
28  
29  
30

31 **Ethics approval.** The authors assert that all procedures contributing to this work comply with  
32 the ethical standards of the relevant national and institutional committees on human  
33 experimentation and with the Helsinki Declaration of 1975, as revised in 2008. Study protocols  
34 have been approved by the Institutional Review Board of the Institute of Biomedical Sciences,  
35 University of São Paulo, and by the National Committee of Ethics in Research, Ministry of  
36 Health of Brazil (CAAE numbers 64767416.6.0000.5467 and 30481820.3.0000.5467). Written  
37 informed consent was obtained from all study participants or their parents/guardians.  
38  
39  
40  
41  
42  
43  
44  
45  
46  
47  
48

49 **Provenance and peer review.** Not commissioned; externally peer-reviewed.  
50  
51  
52  
53

54 **Data availability statement.** Additional data are available on reasonable request.  
55  
56  
57  
58  
59  
60

## References

1. World Health Organization. World Malaria Report 2020. Geneva, World Health Organization, 2020. Available at: <https://www.who.int/publications/i/item/9789240015791>
2. Ferreira MU, Castro MC. Malaria situation in Latin America and the Caribbean: residual and resurgent transmission and challenges for control and elimination. *Methods Mol Biol* 2019;2013:57-70.
3. Corder RM, Ferreira MU, Gomes MGM. Modelling the epidemiology of residual *Plasmodium vivax* malaria in a heterogeneous host population: A case study in the Amazon Basin. *PLoS Comput Biol* 2020;16:e1007377.
4. Alves FP, Durlacher RR, Menezes MJ, *et al.* High prevalence of asymptomatic *Plasmodium vivax* and *Plasmodium falciparum* infections in native Amazonian populations. *Am J Trop Med Hyg* 2002;66:641-648.
5. Roshanravan B, Kari E, Gilman RH, *et al.* Endemic malaria in the Peruvian Amazon region of Iquitos. *Am J Trop Med Hyg* 2003;69:45-52.
6. Ladeia-Andrade S, Ferreira MU, de Carvalho ME, *et al.* Age-dependent acquisition of protective immunity to malaria in riverine populations of the Amazon Basin of Brazil. *Am J Trop Med Hyg* 2009;80:452-459.
7. Carrasco-Escobar G, Miranda-Alban J, Fernandez-Miño C, *et al.* High prevalence of very-low *Plasmodium falciparum* and *Plasmodium vivax* parasitaemia carriers in the Peruvian

- 1  
2  
3 Amazon: insights into local and occupational mobility-related transmission. *Malar J*  
4  
5 2017;16:415.  
6  
7
- 8 8. Carrasco-Escobar G, Gamboa D, Castro MC, *et al.* Micro-epidemiology and spatial  
9  
10 heterogeneity of *P. vivax* parasitaemia in riverine communities of the Peruvian Amazon:  
11  
12 A multilevel analysis. *Sci Rep* 2017;7:8082.  
13  
14
- 15 9. Alves FP, Gil LH, Marrelli MT, *et al.* Asymptomatic carriers of *Plasmodium spp.* as infection  
16  
17 source for malaria vector mosquitoes in the Brazilian Amazon. *J Med Entomol*  
18  
19 2005;42:777-779.  
20  
21  
22
- 23 10. Browder JO. The urban-rural interface: urbanization and tropical forest cover change. *Urban*  
24  
25 *Ecosyst* 2002;6:21-41.  
26  
27
- 28 11. Instituto Brasileiro de Geografia e Estatística (IBGE). Censo Demográfico 2010. Resultados  
29  
30 preliminares da amostra [in Portuguese]. Rio de Janeiro: IBGE, 2011.  
31  
32
- 33 12. Tada MS, Marques RP, Mesquita E, *et al.* Urban malaria in the Brazilian Western Amazon  
34  
35 Region I: high prevalence of asymptomatic carriers in an urban riverside district is  
36  
37 associated with a high level of clinical malaria. *Mem Inst Oswaldo Cruz* 2007;102:263-  
38  
39 269.  
40  
41  
42
- 43 13. Olson SH, Gangnon R, Silveira GA, Patz JA. Deforestation and malaria in Mâncio Lima  
44  
45 County, Brazil. *Emerg Infect Dis* 2010;16:1108-1115.  
46  
47
- 48 14. Almeida ACG, Kuehn A, Castro AJM, *et al.* High proportions of asymptomatic and  
49  
50 submicroscopic *Plasmodium vivax* infections in a peri-urban area of low transmission in  
51  
52 the Brazilian Amazon. *Parasit Vectors* 2018;11:194.  
53  
54  
55  
56  
57  
58  
59  
60

- 1  
2  
3 15. Costa KM, de Almeida WA, Magalhães IB, *et al.* Malaria in Cruzeiro do Sul (Western  
4  
5 Brazilian Amazon): analysis of the historical series from 1998 to 2008 [in Portuguese].  
6  
7 *Rev Panam Salud Publica* 2010;28:353-360.  
8  
9
- 10 16. da Silva-Nunes M, Moreno M, Conn JE, *et al.* Amazonian malaria: asymptomatic human  
11  
12 reservoirs, diagnostic challenges, environmentally driven changes in mosquito vector  
13  
14 populations, and the mandate for sustainable control strategies. *Acta Trop* 2012;121:281-  
15  
16 91.  
17  
18
- 19 17. Nicolete VC, Rodrigues PT, Johansen IC, *et al.* Interacting epidemics in Amazonian Brazil:  
20  
21 Prior dengue infection associated with increased COVID-19 risk in a population-based  
22  
23 cohort study. *Clin Infect Dis* 2021; May 6:ciab410. doi: 10.1093/cid/ciab410.  
24  
25  
26
- 27 18. Bueno MCD, Lima RNS. The degree of urbanisation in Brazil. *Regional Stat* 2019; 9: 72-84.  
28  
29
- 30 19. Dal'Asta AP, Lana RM, Amaral S, Codeço CT, Monteiro AMV. The urban gradient in  
31  
32 malaria-endemic municipalities in Acre: Revisiting the role of locality. *Int J Environ Res*  
33  
34 *Publ Health* 2018;15:1254.  
35  
36  
37
- 38 20. Ministry of Health of Brazil. List of municipalities belonging to areas at risk or endemic for  
39  
40 malaria [in Portuguese]. Brasília, Ministry of Health of Brazil, 2019. Available at:  
41  
42 [https://www.saude.gov.br/images/pdf/2019/junho/25/Lista-de-municipios-pertencentes-](https://www.saude.gov.br/images/pdf/2019/junho/25/Lista-de-municipios-pertencentes-as-areas-de-risco-ou-endemicas-para-malaria.pdf)  
43  
44 [as-areas-de-risco-ou-endemicas-para-malaria.pdf](https://www.saude.gov.br/images/pdf/2019/junho/25/Lista-de-municipios-pertencentes-as-areas-de-risco-ou-endemicas-para-malaria.pdf)  
45  
46
- 47 21. Corder RM, Paula GA, Pincelli A, Ferreira MU. Statistical modeling of surveillance data to  
48  
49 identify correlates of urban malaria risk: A population-based study in the Amazon Basin.  
50  
51 *PLoS One* 2019;14:e0220980.  
52  
53  
54  
55  
56  
57  
58  
59  
60

- 1  
2  
3 22. Ministry of Health of Brazil. Guidelines for malaria therapy in Brazil [in Portuguese].  
4  
5 Brasília, Ministry of Health of Brazil, 2020. Available at:  
6  
7 <https://portalarquivos2.saude.gov.br/images/pdf/2020/janeiro/29/af-guia-tratamento->  
8  
9 [malaria-28jan20-isbn.pdf](https://portalarquivos2.saude.gov.br/images/pdf/2020/janeiro/29/af-guia-tratamento-malaria-28jan20-isbn.pdf)  
10  
11  
12
- 13 23. Ladeia-Andrade S, Menezes MJ, de Sousa TN, *et al.* Monitoring the efficacy of chloroquine-  
14  
15 primaquine therapy for uncomplicated *Plasmodium vivax* malaria in the main  
16  
17 transmission hot spot of Brazil. *Antimicrob Agents Chemother* 2019;63:e01965-18.  
18  
19
- 20 24. Itoh M, Negreiros do Valle S, Farias S, *et al.* Efficacy of artemether-lumefantrine for  
21  
22 uncomplicated *Plasmodium falciparum* malaria in Cruzeiro do Sul, Brazil, 2016. *Am J*  
23  
24 *Trop Med Hyg* 2018;98:88-94.  
25  
26
- 27 25. Harris PA, Taylor R, Thielke R, *et al.* Research electronic data capture (REDCap) – A  
28  
29 metadata-driven methodology and workflow process for providing translational research  
30  
31 informatics support. *J Biomed Inform* 2009;42:377-381.  
32  
33  
34
- 35 26. Putaporntip C, Buppan P, Jongwutiwes S. Improved performance with saliva and urine as  
36  
37 alternative DNA sources for malaria diagnosis by mitochondrial DNA-based PCR assays.  
38  
39 *Clin Microbiol Infect* 2011;17:1484-91.  
40  
41
- 42 27. Zimmerman PA, Ferreira MU, Howes RE, Mercereau-Puijalon O. Red blood cell  
43  
44 polymorphism and susceptibility to *Plasmodium vivax*. *Adv Parasitol* 2013;81:27-76.  
45  
46
- 47 28. Marcsisin SR, Reichard G, Pybus BS. Primaquine pharmacology in the context of CYP 2D6  
48  
49 pharmacogenomics: current state of the art. *Pharmacol Ther* 2016;161:1-10.  
50  
51  
52  
53  
54  
55  
56  
57  
58  
59  
60

- 1  
2  
3 29. de Oliveira TC, Rodrigues PT, Menezes MJ, *et al.* Genome-wide diversity and differentiation  
4  
5 in New World populations of the human malaria parasite *Plasmodium vivax*. *PLoS Negl*  
6  
7 *Trop Dis* 2017;11:e0005824.  
8  
9
- 10 30. Daher A, Silva JCAL, Stevens A, *et al.* Evaluation of *Plasmodium vivax* malaria recurrence  
11  
12 in Brazil. *Malar J* 2019;18:18.  
13  
14
- 15 31. dos Reis IC, Codeço CT, Degener CM, *et al.* Contribution of fish farming ponds to the  
16  
17 production of immature *Anopheles* spp. in a malaria-endemic Amazonian town. *Malar J*  
18  
19 2015;14:452.  
20  
21  
22
- 23 32. Johansen IC, Rodrigues PT, Ferreira MU. Human mobility and urban malaria risk in the  
24  
25 main transmission hotspot of Amazonian Brazil. *PLoS One* 2020;15:e0242357.  
26  
27
- 28 33. de Oliveira TC, Corder RM, Early A, *et al.* Population genomics reveals the expansion of  
29  
30 highly inbred *Plasmodium vivax* lineages in the main malaria hotspot of Brazil. *PLoS*  
31  
32 *Negl Trop Dis* 2020;14:e0008808.  
33  
34
- 35 34. Salla LC, Rodrigues PT, Corder RM, *et al.* Molecular evidence of sustained urban malaria  
36  
37 transmission in Amazonian Brazil, 2014-2015. *Epidemiol Infect* 2020;148:e47.  
38  
39
- 40 35. Maheu-Giroux M, Casapía M, Sotto-Calle VE, *et al.* Risk of malaria transmission from fish  
41  
42 ponds in the Peruvian Amazon. *Acta Trop* 2010; 115:112-118.  
43  
44
- 45 36. Barros FS, Honório NA. Deforestation and malaria on the Amazon frontier: larval clustering  
46  
47 of *Anopheles darlingi* (Diptera: Culicidae) determines focal distribution of malaria. *Am J*  
48  
49 *Trop Med Hyg* 2015;93:939-953.  
50  
51  
52  
53  
54  
55  
56  
57  
58  
59  
60

- 1  
2  
3 37. Martins LMO, David MR, Maciel-de-Freitas R, Silva-do-Nascimento TF. Diversity of  
4  
5 Anopheles mosquitoes from four landscapes in the highest endemic region of malaria  
6  
7 transmission in Brazil. *J Vector Ecol* 2018;43:235–244.  
8  
9  
10 38. Castro MC, Baeza A, Codeço CT, *et al.* Development, environmental degradation, and  
11  
12 disease spread in the Brazilian Amazon. *PLoS Biol* 2019;17:e3000526.  
13  
14  
15  
16  
17  
18  
19  
20  
21  
22  
23  
24  
25  
26  
27  
28  
29  
30  
31  
32  
33  
34  
35  
36  
37  
38  
39  
40  
41  
42  
43  
44  
45  
46  
47  
48  
49  
50  
51  
52  
53  
54  
55  
56  
57  
58  
59  
60

1  
2  
3 **Figure legend.**  
4  
5  
6  
7

8  
9 Figure 1. Participant flowchart of the Mâncio Lima cohort study of urban malaria.  
10  
11  
12  
13  
14  
15  
16  
17  
18  
19  
20  
21  
22  
23  
24  
25  
26  
27  
28  
29  
30  
31  
32  
33  
34  
35  
36  
37  
38  
39  
40  
41  
42  
43  
44  
45  
46  
47  
48  
49  
50  
51  
52  
53  
54  
55  
56  
57  
58  
59  
60

For peer review only



Table 1. Data collected for the Mâncio Lima cohort study of urban malaria

| Measures                   | Description                                                                                                                                                                                                                    |
|----------------------------|--------------------------------------------------------------------------------------------------------------------------------------------------------------------------------------------------------------------------------|
| <b>Questionnaire data</b>  |                                                                                                                                                                                                                                |
| Demographic                | Age; gender; pregnancy status; birthplace; literacy; <u>second residence outside the urban area (no/yes)<sup>a</sup></u>                                                                                                       |
| Socioeconomic              | <u>Housing characteristics and ownership of assets; beneficiary of social programs (social security pension, conditional cash transfer program)</u>                                                                            |
| Occupational               | Individual work status (does not work; formal employee; informal employee; employer)                                                                                                                                           |
| Behavioral                 | Regular fishing (no/yes); sleeping by the river (no/yes); sleeps with open or closed window (no/yes); time that go to bed and wake up; bathing inside or outside the house; use of bed nets during the night before interview. |
| Travel history             | Overnight trip outside the town since the last follow-up visit (no/yes, place most frequently visited and duration of stay)                                                                                                    |
| Morbidity                  | Laboratory-diagnosed malaria since the last follow-up visit (how many positive diagnosis and parasite species); malaria symptoms in the 7 days prior to the interview                                                          |
| <b>Laboratory data</b>     |                                                                                                                                                                                                                                |
| Malaria microscopy         | Giemsa-stained thick smears                                                                                                                                                                                                    |
| Malaria RDT                | QuickProfile Pf/Pv immunochromatographic test (LumiQuick, Santa Clara, USA).                                                                                                                                                   |
| Malaria PCR                | Genus-specific quantitative PCR protocol that targets the mitochondrial genome followed by species-specific amplification                                                                                                      |
| Duffy/DARC genotyping      | TaqMan assays (Applied Biosystems, Foster City, USA) to genotype rs2814778 and rs12075                                                                                                                                         |
| CYP2D6 genotyping          | TaqMan assays (Applied Biosystems) to genotype 12 CYP2D6 single nucleotide polymorphisms and quantify <i>CYP2D6</i> gene copy number                                                                                           |
| SARS-CoV-2 antibodies      | ELISA for IgG antibodies to the recombinant subdomain S1 of the SARS-CoV-2 spike protein (EI 2606-9601 G; Euroimmun, Lübeck, Germany)                                                                                          |
| Dengue antibodies          | ELISA for IgG antibodies to dengue virus serotype 2 viral particles (EI 266b-9601 G; Euroimmun, Lübeck, Germany)                                                                                                               |
| Parasite phenotypes        | Ex-vivo assays of drug sensitivity and red blood cell invasion                                                                                                                                                                 |
| Parasite genome sequencing | Whole-genome sequencing on an Illumina NovaSeq next-generation sequencer                                                                                                                                                       |

1  
2  
3  
4  
5  
6  
7  
8  
9  
10  
11  
12  
13  
14  
15  
16  
17  
18  
19  
20  
21  
22  
23  
24  
25  
26  
27  
28  
29  
30  
31  
32  
33  
34  
35  
36  
37  
38  
39  
40  
41  
42  
43  
44  
45  
46  
47

<sup>a</sup>Household-level variables are underlined.

For peer review only

Table 2. Timeline of measurements for the Mâncio Lima cohort study of urban malaria

| Variables                                                | Census survey<br>(Nov 15-Apr 16) | Visit 1<br>(Apr-May 18) | Visit 2<br>(Sep-Oct 18) | Visit 3<br>(Apr-May 19) | Visit 4<br>(Oct-Nov 19) | Visit 5<br>(Oct-Nov 20) |
|----------------------------------------------------------|----------------------------------|-------------------------|-------------------------|-------------------------|-------------------------|-------------------------|
| <b>Questionnaire data</b>                                |                                  |                         |                         |                         |                         |                         |
| No. participants interviewed                             | 9,124                            | 1,394                   | 2,009                   | 2,017                   | 2,130                   | 2,074                   |
| Demographic                                              | √                                | √                       | √                       | √                       | √                       | √                       |
| Socioeconomic                                            | √                                | √                       | √                       | √                       | √                       | √                       |
| Occupational                                             |                                  | √                       | √                       | √                       | √                       | √                       |
| Behavioral                                               |                                  | √                       | √                       | √                       | √                       | √                       |
| Clinical                                                 |                                  | √                       | √                       | √                       | √                       | √                       |
| Travel history                                           |                                  |                         |                         | √                       | √                       | √                       |
| <b>Laboratory data</b>                                   |                                  |                         |                         |                         |                         |                         |
| No. blood samples collected <sup>a</sup>                 |                                  | 1,082                   | 1,696                   | 1,578                   | 1,768                   | 1,677                   |
| Malaria microscopy                                       |                                  | √                       | √                       | √                       | √                       | √                       |
| Malaria RDT                                              |                                  |                         | √                       | √                       | √                       | √                       |
| Malaria PCR                                              |                                  |                         | √                       | √                       | √                       | √                       |
| Duffy/DARC genotyping                                    |                                  | √                       | √                       | √                       | √                       | √                       |
| CYP2D6 genotyping                                        |                                  | √                       | √                       | √                       | √                       | √                       |
| SARS-CoV-2 antibodies                                    |                                  |                         |                         |                         |                         | √                       |
| Dengue antibodies                                        |                                  |                         |                         |                         | √                       | √                       |
| Malaria parasite sequencing and phenotyping <sup>b</sup> |                                  | √                       | √                       | √                       | √                       | √                       |

1  
2  
3 √ denotes that the measurement has been made at the noted study visit.

4 <sup>a</sup>Finger-prick capillary blood samples collected for malaria diagnosis were used for human genetic and SARS-CoV-2 studies

5 <sup>b</sup>Venous blood samples were collected from consenting study participants with laboratory-confirmed malaria and leukocyte-depleted  
6 for whole-genome sequencing and ex-vivo phenotypic assays.  
7  
8  
9  
10  
11  
12  
13  
14  
15  
16  
17  
18  
19  
20  
21  
22  
23  
24  
25  
26  
27  
28  
29  
30  
31  
32  
33  
34  
35  
36  
37  
38  
39  
40  
41  
42  
43  
44  
45  
46  
47

For peer review only

**Table 3.** Number of malarial infections diagnosed by rapid diagnostic test (RDT) and conventional microscopy, according to the presence of malaria-related symptoms, during 5 consecutive cross-sectional surveys in the Mâncio Lima, cohort (2018-2020).

| Symptoms       | Species              | Study visit |            |       |            |       |            |       |            |       |            |
|----------------|----------------------|-------------|------------|-------|------------|-------|------------|-------|------------|-------|------------|
|                |                      | 1           |            | 2     |            | 3     |            | 4     |            | 5     |            |
|                |                      | RDT         | Microscopy | RDT   | Microscopy | RDT   | Microscopy | RDT   | Microscopy | RDT   | Microscopy |
| Yes            | <i>P. falciparum</i> | -           | 3          | 4     | 0          | 0     | 3          | 1     | 1          | 0     | 0          |
|                | <i>P. vivax</i>      | -           | 2          | 4     | 8          | 2     | 4          | 0     | 0          | 0     | 2          |
|                | Mixed                | -           | 0          | 0     | 0          | 1     | 0          | 0     | 0          | 0     | 0          |
|                | No. tested           | -           | 218        | 307   | 308        | 182   | 182        | 205   | 205        | 137   | 137        |
| No             | <i>P. falciparum</i> | -           | 5          | 4     | 3          | 3     | 3          | 3     | 1          | 0     | 1          |
|                | <i>P. vivax</i>      | -           | 12         | 5     | 5          | 2     | 5          | 3     | 3          | 0     | 1          |
|                | Mixed                | -           | 0          | 0     | 0          | 1     | 1          | 0     | 0          | 0     | 0          |
|                | No. tested           | -           | 864        | 1,389 | 1,388      | 1,396 | 1,396      | 1,563 | 1,563      | 1,540 | 1,540      |
| Total          | <i>P. falciparum</i> | -           | 8          | 8     | 3          | 3     | 6          | 4     | 2          | 0     | 1          |
|                | <i>P. vivax</i>      | -           | 14         | 9     | 13         | 4     | 9          | 3     | 3          | 0     | 3          |
|                | Mixed                | -           | 0          | 0     | 0          | 2     | 1          | 0     | 0          | 0     | 0          |
|                | No. tested           | -           | 1,082      | 1,696 | 1,696      | 1,578 | 1,578      | 1,768 | 1,768      | 1,677 | 1,677      |
| Prevalence (%) | <i>P. falciparum</i> | -           | 0.6        | 0.4   | 0.1        | 0.1   | 0.3        | 0.2   | 0.1        | 0.0   | 0.0        |
|                | <i>P. vivax</i>      | -           | 1.0        | 0.4   | 0.6        | 0.2   | 0.4        | 0.1   | 0.1        | 0.0   | 0.1        |
|                | Mixed                | -           | 0.0        | 0.0   | 0.0        | 0.1   | 0.0        | 0.0   | 0.0        | 0.0   | 0.0        |

Dates of study visits: 1, April-May, 2018; 2, September-October, 2018; 3, May-June, 2019; 4, September-October, 2019; and 5, October-November, 2020. Symptoms (at least one present within the past two weeks): fever, chills, sweating, headache, nausea, vomiting, myalgia, and arthralgia.

1  
2  
3  
4  
5  
6  
7  
8  
9  
10  
11  
12  
13  
14  
15  
16  
17  
18  
19  
20  
21  
22  
23  
24  
25  
26  
27  
28  
29  
30  
31  
32  
33  
34  
35  
36  
37  
38  
39  
40  
41  
42  
43  
44  
45  
46  
47

For peer review only

1  
2  
3  
4  
5  
6  
7  
8  
9  
10  
11  
12  
13  
14  
15  
16  
17  
18  
19  
20  
21  
22  
23  
24  
25  
26  
27  
28  
29  
30  
31  
32  
33  
34  
35  
36  
37  
38  
39  
40  
41  
42  
43  
44  
45  
46  
47  
48  
49  
50  
51  
52  
53  
54  
55  
56  
57  
58  
59  
60



1  
2  
3 Supplemental Material for:  
4  
5  
6  
7

8 Cohort profile: The Mâncio Lima cohort study of urban malaria in Amazonian  
9 Brazil  
10

11 Igor C Johansen,<sup>1\*</sup> Priscila T Rodrigues,<sup>1\*</sup> Juliana Tonini,<sup>1</sup> Joseph M Vinetz,<sup>2</sup> Marcia C Castro,<sup>3</sup>  
12 Marcelo U Ferreira<sup>1</sup>  
13  
14

15 <sup>1</sup>Department of Parasitology, Institute of Biomedical Sciences, University of São Paulo, São  
16 Paulo, SP, Brazil.  
17

18 <sup>2</sup>Section of Infectious Diseases, Department of Internal Medicine, Yale School of Medicine New  
19 Haven, CT, USA.  
20  
21

22 <sup>3</sup>Department of Global Health and Population, Harvard University T H Chan School of Public  
23 Health, Boston, MA, USA.  
24  
25  
26  
27  
28  
29  
30  
31  
32  
33  
34  
35  
36  
37  
38  
39  
40  
41  
42  
43  
44  
45  
46  
47  
48  
49  
50  
51  
52  
53  
54  
55  
56  
57  
58  
59  
60





**Supplemental Fig. 1. Study Site.** The left panel shows the location of the Municipality of Mâncio Lima, in northwestern Brazil, next to the border with Peru. The right panel shows an aerial photography of the town of Mâncio Lima. (Photography by Rodrigo M. Corder.)

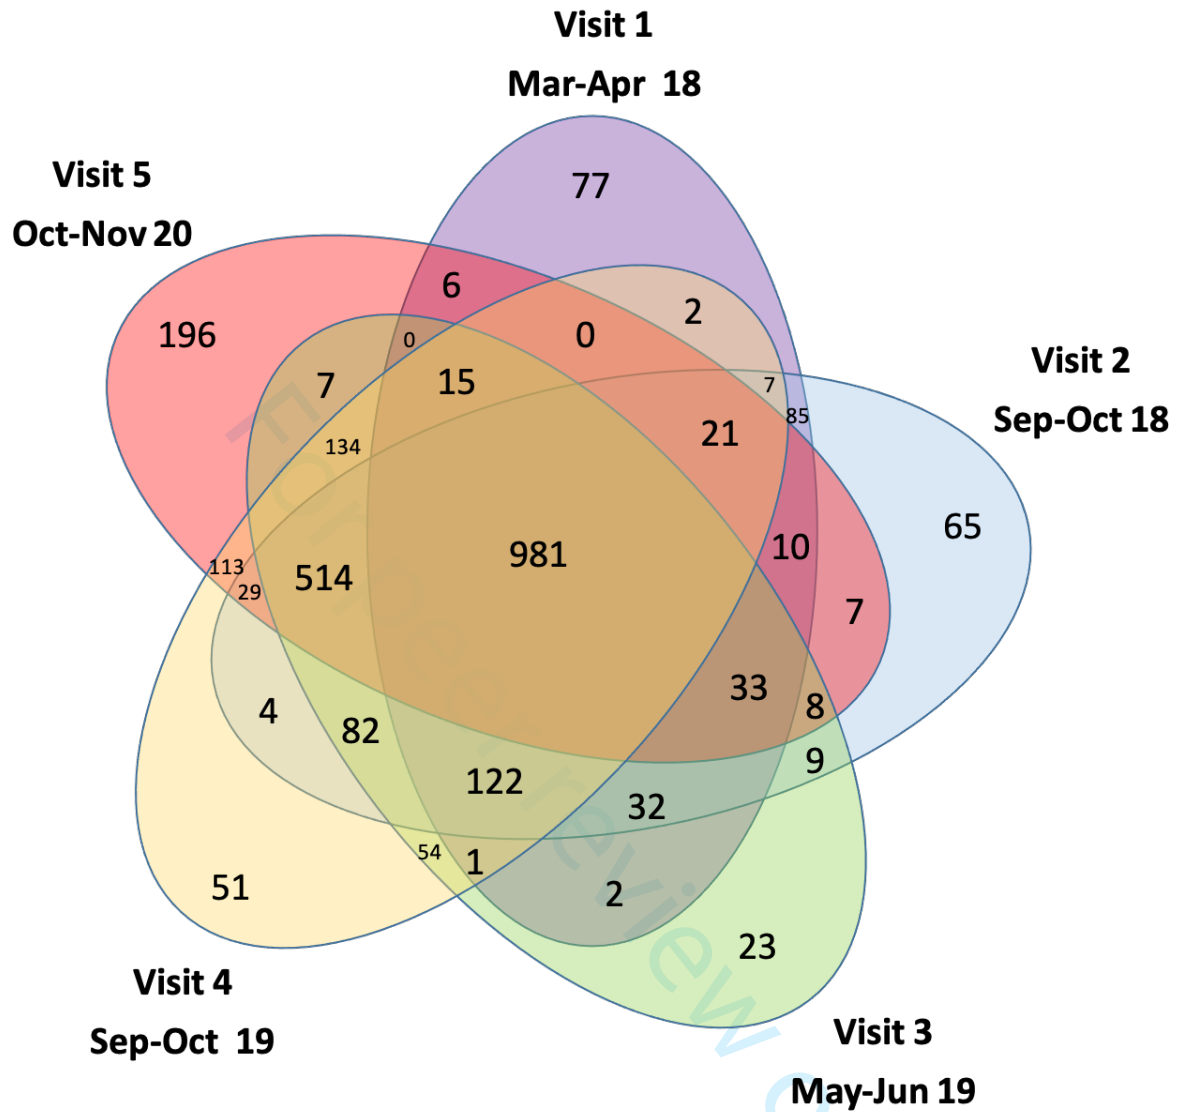

**Supplemental Fig. 2. Participants in consecutive study visits.** The Venn diagram shows the number of individuals interviewed in each study visit and in different combinations of them. Note that 981 individuals participated in all study visits.

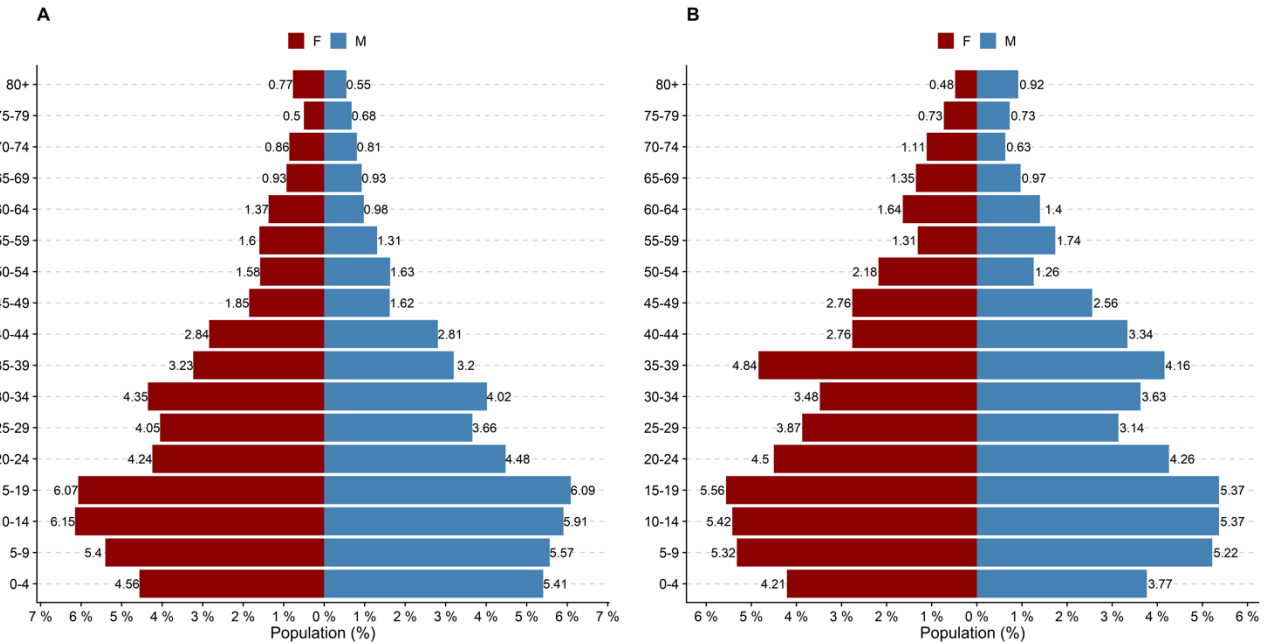

**Supplemental Fig. 3. Representativeness of the study population according to sex and age groups.** Compared with the total population of Mâncio Lima enumerated during the baseline census carried out between November 2015 and April 2016 (A), the study sample has a very similar distribution according to sex and age groups (B).



**Supplemental Fig. 4. Representativeness of the study population according to place of residence.** Compared with the total population of Mâncio Lima enumerated during the baseline census carried out between November 2015 and April 2016 (A), the study sample has a nearly equal distribution according to place of residence (B).

1  
2  
3 **Supplemental Table 1. Short videos about the Mâncio Lima cohort study**  
4  
5

| Access                                                                                                | Topic                                      | Producer                    |
|-------------------------------------------------------------------------------------------------------|--------------------------------------------|-----------------------------|
| <a href="https://youtu.be/oEwJPHiBNmc">https://youtu.be/oEwJPHiBNmc</a>                               | Field study set-up, March 2018             | TV USP                      |
| <a href="https://www.youtube.com/watch?v=CBx7z0ApznI">https://www.youtube.com/watch?v=CBx7z0ApznI</a> | House-to-house visits, March 2018          | TV USP                      |
| <a href="https://youtu.be/wE3gJfdRpVo">https://youtu.be/wE3gJfdRpVo</a>                               | Impact of COVID-19 on malaria, August 2020 | Agência FAPESP <sup>a</sup> |

15  
16 <sup>a</sup>Five short videos on COVID-19 research in the field site were produced; a teaser can be found at:

17 [https://www.youtube.com/watch?v=lg1Ug-T\\_whQ&list=PLPdNbZy8nStgk8tZiXn7M7E9EeWXQ2zl9&index=1](https://www.youtube.com/watch?v=lg1Ug-T_whQ&list=PLPdNbZy8nStgk8tZiXn7M7E9EeWXQ2zl9&index=1).  
18  
19  
20  
21  
22  
23  
24  
25  
26  
27  
28  
29  
30  
31  
32  
33  
34  
35  
36  
37  
38  
39  
40  
41  
42  
43  
44  
45  
46  
47

**Supplemental Table 2. Sociodemographic, occupational, and behavioral characteristics, housing quality, and travel history at the enrollment of the Mâncio Lima cohort study population (individuals who participated in at least one of five consecutive study visits; n= 2,690)**

| Type of measure            | Variable                                           | Description                  | Value       |               |
|----------------------------|----------------------------------------------------|------------------------------|-------------|---------------|
| Demographic                | Age (years)                                        | Range                        | 0-103       |               |
|                            |                                                    | Mean                         | 26.4        |               |
|                            |                                                    | Median                       | 22          |               |
|                            |                                                    | Standard deviation (SD)      | 19.8        |               |
|                            | Gender                                             | Male                         |             | 1,311 (48.7%) |
|                            |                                                    | Female                       |             | 1,379 (51.3%) |
|                            |                                                    | Total                        |             | 2,690 (100%)  |
|                            | Pregnant?<br>(only females)                        | No                           |             | 1,325 (96.1%) |
|                            |                                                    | Yes                          |             | 43 (3.1%)     |
|                            |                                                    | Does not know/did not answer |             | 11 (0.8%)     |
|                            |                                                    | Total                        |             | 1,379 (100%)  |
|                            | Birthplace                                         | Mâncio Lima                  |             | 1394 (51.8%)  |
|                            |                                                    | Other, Juruá Valley          |             | 985 (36.6%)   |
|                            |                                                    | Other, Amazon                |             | 255 (9.5%)    |
|                            |                                                    | Other, elsewhere in Brazil   |             | 8 (0.3%)      |
|                            |                                                    | Does not know/did not answer |             | 48 (1.8%)     |
|                            |                                                    | Total                        |             | 2,690 (100%)  |
|                            | Literacy<br>(only ≥10 years old)                   | Illiterate                   |             | 159 (7.6%)    |
|                            |                                                    | Literate                     |             | 1,911 (91.8%) |
|                            |                                                    | Does not know/did not answer |             | 12 (0.6%)     |
|                            |                                                    | Total                        |             | 2,082 (100%)  |
|                            | Highest level of schooling<br>(only ≥25 years old) | Never studied                |             | 190 (15.5%)   |
|                            |                                                    | Incomplete elementary school |             | 493 (40.3%)   |
| Complete elementary school |                                                    |                              | 32 (2.6%)   |               |
| Incomplete high school     |                                                    |                              | 279 (22.8%) |               |

|                                                   |                                          |                              |               |
|---------------------------------------------------|------------------------------------------|------------------------------|---------------|
|                                                   |                                          | Complete high school         | 69 (5.6%)     |
|                                                   |                                          | Incomplete college           | 119 (9.7%)    |
|                                                   |                                          | Complete college             | 43 (3.5%)     |
|                                                   |                                          | Total                        | 1,225 (100%)  |
|                                                   | Second residence outside the urban area? | No                           | 2,017 (75.0%) |
|                                                   |                                          | Yes                          | 446 (16.6%)   |
|                                                   |                                          | Does not know/did not answer | 227 (8.4%)    |
|                                                   |                                          | Total                        | 2,690 (100%)  |
| <b>Household</b>                                  | Wall material                            | Masonry                      | 926 (34.4%)   |
|                                                   |                                          | Wood                         | 1,762 (65.6%) |
|                                                   |                                          | Rammed earth                 | 1 (0.0%)      |
|                                                   |                                          | Other                        | 1 (0.0%)      |
|                                                   |                                          | Total                        | 2,690 (100%)  |
|                                                   | Floor material                           | Masonry                      | 247 (9.2%)    |
|                                                   |                                          | Wood                         | 850 (31.6%)   |
|                                                   |                                          | Ceramics                     | 1,386 (51.5%) |
|                                                   |                                          | Cement                       | 202 (7.5%)    |
|                                                   |                                          | Other                        | 5 (0.2%)      |
|                                                   |                                          | Total                        | 2,690 (100%)  |
|                                                   | Roofing material                         | Asbestos                     | 2,176 (80.9%) |
|                                                   |                                          | Aluminium                    | 460 (17.1%)   |
|                                                   |                                          | Wood                         | 15 (0.6%)     |
|                                                   |                                          | Clay tile                    | 17 (0.6%)     |
|                                                   |                                          | Other                        | 22 (0.8%)     |
| Total                                             |                                          | 2,690 (100%)                 |               |
| Presence of a suspended ceiling beneath the roof? | No                                       | 2,046 (76.1%)                |               |
|                                                   | Yes                                      | 644 (23.9%)                  |               |
|                                                   | Total                                    | 2,690 (100%)                 |               |

|    |                                                               |        |      |
|----|---------------------------------------------------------------|--------|------|
| 1  | How many rooms are there in this house?                       | Range  | 1-16 |
| 2  |                                                               | Mean   | 5.6  |
| 3  |                                                               | Median | 5    |
| 4  |                                                               | SD     | 1.7  |
| 5  | How many rooms are utilized as bedrooms?                      | Range  | 1-8  |
| 6  |                                                               | Mean   | 2.5  |
| 7  |                                                               | Median | 2    |
| 8  |                                                               | SD     | 0.9  |
| 9  | How many beds are there in your house?                        | Range  | 1-7  |
| 10 |                                                               | Mean   | 3    |
| 11 |                                                               | Median | 3    |
| 12 |                                                               | SD     | 1.1  |
| 13 | How many insecticide-treated bednets are there in your house? | Range  | 0-7  |
| 14 |                                                               | Mean   | 1.5  |
| 15 |                                                               | Median | 1    |
| 16 |                                                               | SD     | 1.5  |
| 17 | How many toilets are there in your house?                     | Range  | 0-5  |
| 18 |                                                               | Mean   | 1.2  |
| 19 |                                                               | Median | 1    |
| 20 |                                                               | SD     | 0.6  |
| 21 | Number of people in the household                             | Range  | 1-13 |
| 22 |                                                               | Mean   | 4.9  |
| 23 |                                                               | Median | 4    |

1  
2  
3  
4  
5  
6  
7  
8  
9  
10  
11  
12  
13  
14  
15  
16  
17  
18  
19  
20  
21  
22  
23  
24  
25  
26  
27  
28  
29  
30  
31  
32  
33  
34  
35  
36  
37  
38  
39  
40  
41  
42  
43  
44  
45  
46  
47



|                     |                                                                                                                   | SD                                                                                                         | 2.2                                                                                   |
|---------------------|-------------------------------------------------------------------------------------------------------------------|------------------------------------------------------------------------------------------------------------|---------------------------------------------------------------------------------------|
|                     | Any household member is beneficiary of social programs (e.g. social security pension, conditional cash transfer)? | No<br>Yes<br>Total                                                                                         | 539 (20.0%)<br>2,151 (80.0%)<br>2,690 (100%)                                          |
| <b>Occupational</b> | Individual work status (only ≥10 years old)                                                                       | Does not work<br>Formal employee<br>Informal employee<br>Employer<br>Does not know/did not answer<br>Total | 1,259 (60.5%)<br>207 (9.9%)<br>567 (27.2%)<br>14 (0.7%)<br>35 (1.7%)<br>23,082 (100%) |
| <b>Behavioral</b>   | Regular fishing                                                                                                   | No<br>Yes<br>Does not know/did not answer<br>Total                                                         | 2,350 (87.4%)<br>296 (11.0%)<br>44 (1.6%)<br>2,690 (100%)                             |
|                     | Sleep by the river                                                                                                | No<br>Yes<br>Does not know/did not answer<br>Total                                                         | 2,465 (91.6%)<br>180 (66.9%)<br>45 (1.7%)<br>2,690 (100%)                             |
|                     | Sleep with open or closed window                                                                                  | Closed<br>Open<br>Varies<br>Does not know/did not answer<br>Total                                          | 2,639 (98.1%)<br>11 (0.4%)<br>8 (0.3%)<br>32 (1.2%)<br>2,690 (100%)                   |
|                     | Sleep time                                                                                                        | Mean (hours:minutes)<br>Median                                                                             | 07:52 pm<br>21:00 pm                                                                  |

1  
2  
3  
4  
5  
6  
7  
8  
9  
10  
11  
12  
13  
14  
15  
16  
17  
18  
19  
20  
21  
22  
23  
24  
25  
26  
27  
28  
29  
30  
31  
32  
33  
34  
35  
36  
37  
38  
39  
40  
41  
42  
43  
44  
45  
46  
47

|                       |                                                            |                              |                                     |
|-----------------------|------------------------------------------------------------|------------------------------|-------------------------------------|
|                       | Wake-up time                                               | Mean hours:minutes)          | 06:24 am                            |
|                       |                                                            | Median                       | 06:00 am                            |
|                       | Bathing inside or outside the house?                       | Inside                       | 1,256 (46.7%)                       |
|                       |                                                            | Outside                      | 1,322 (49.1%)                       |
|                       |                                                            | Both                         | 67 (2.5%)                           |
|                       |                                                            | Does not know/did not answer | 45 (1.7%)                           |
|                       |                                                            | Total                        | 2,690 (100%)                        |
|                       | Slept under bednet past night?                             | No                           | 957 (35.6%)                         |
|                       |                                                            | Yes, not insecticide-treated | 526 (19.6%)                         |
|                       |                                                            | Yes, insecticide-treated     | 1,141 (42.4%)                       |
|                       |                                                            | Does not know/did not answer | 66 (2.4%)                           |
|                       |                                                            | Total                        | 2,690 (100%)                        |
| <b>Travel history</b> | Overnight trip outside the town within the past 6 months?  | No                           | 1,825 (67.8%)                       |
|                       |                                                            | Yes                          | 857 (31.9%)                         |
|                       |                                                            | Does not know/did not answer | 8 (0.3%)                            |
|                       |                                                            | Total                        | 2,690 (100%)                        |
|                       | Most common travel destinations and total duration of stay | 1st                          | City of Cruzeiro do Sul: 4,334 days |
|                       |                                                            | 2nd                          | Timbaúba: 4,318 days                |
|                       |                                                            | 3rd                          | Ramal do Feijão Inosso, 2,300 days  |
|                       |                                                            | 4th                          | Puyanawa reserve: 2,097 days        |
|                       |                                                            | 5th                          | Ramal do Batoque, 2,037 days        |

For peer review only

1  
2  
3  
4  
5  
6  
7  
8  
9  
10  
11  
12  
13  
14  
15  
16  
17  
18  
19  
20  
21  
22  
23  
24  
25  
26  
27  
28  
29  
30  
31  
32  
33  
34  
35  
36  
37  
38  
39  
40  
41  
42  
43  
44  
45  
46  
47
