# Supplementary material for: Cohort profile: the Mâncio Lima cohort study of urban malaria in Amazonian Brazil
Source: PubMed Central journal article supplement — BMJ Open. 2021 Nov 16;11(11):e048073. doi: 10.1136/bmjopen-2020-048073 (PMC8727682; doi:10.1136/bmjopen-2020-048073), 2021-11-16
Supplement: bmjopen-2020-048073supp001.pdf [file bmjopen-2020-048073supp001.pdf]

Supplemental Material for:

## Cohort profile: The Mâncio Lima cohort study of urban malaria in Amazonian Brazil

Igor C Johansen,<sup>1\*</sup> Priscila T Rodrigues,<sup>1\*</sup> Juliana Tonini,<sup>1</sup> Joseph M Vinetz,<sup>2</sup> Marcia C Castro,<sup>3</sup> Marcelo U Ferreira<sup>1</sup>

<sup>1</sup>Department of Parasitology, Institute of Biomedical Sciences, University of São Paulo, São Paulo, SP, Brazil.

<sup>2</sup>Section of Infectious Diseases, Department of Internal Medicine, Yale School of Medicine New Haven, CT, USA.

<sup>3</sup>Department of Global Health and Population, Harvard University T H Chan School of Public Health, Boston, MA, USA.

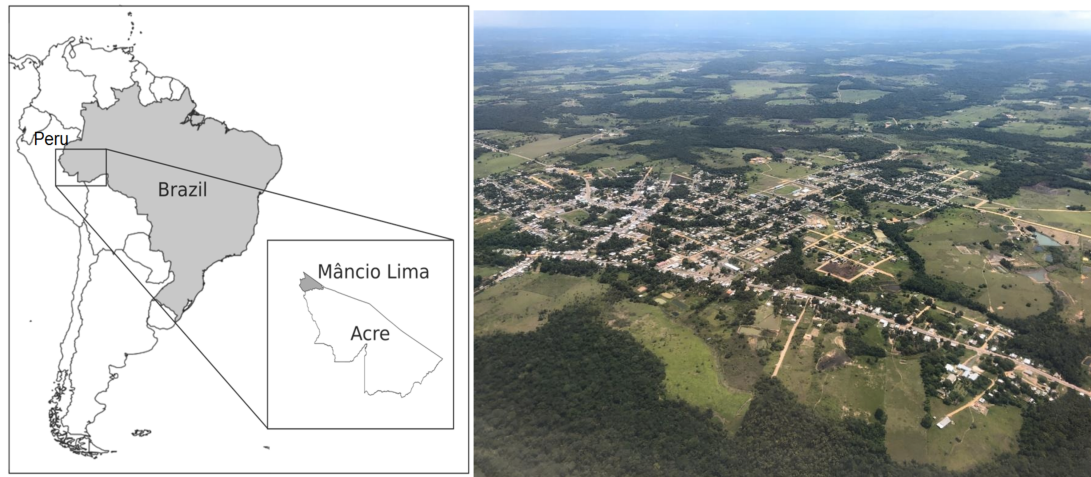

**Supplemental Fig. 1. Study Site.** The left panel shows the location of the Municipality of Mâncio Lima, in northwestern Brazil, next to the border with Peru. The right panel shows an aerial photography of the town of Mâncio Lima. (Photography by Rodrigo M. Corder.)

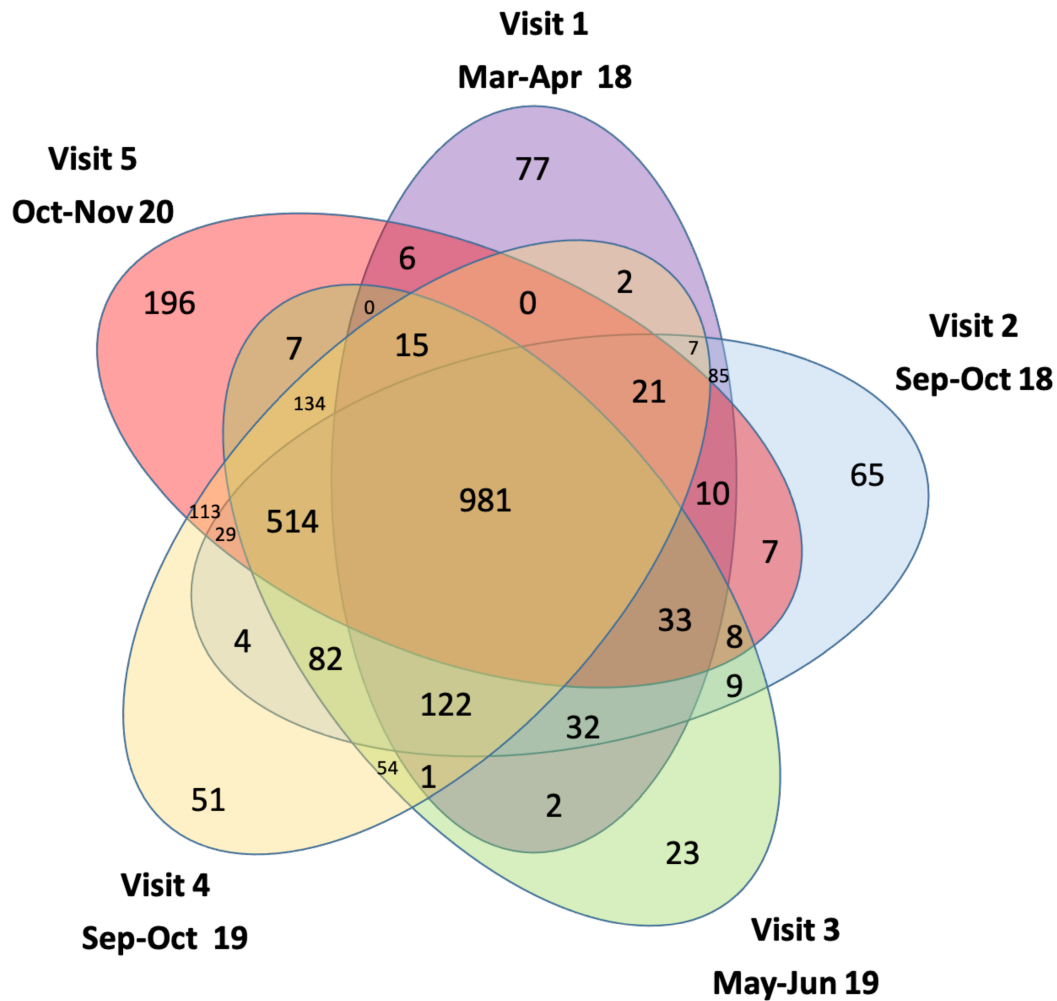

**Supplemental Fig. 2. Participants in consecutive study visits.** The Venn diagram shows the number of individuals interviewed in each study visit and in different combinations of them. Note that 981 individuals participated in all study visits.

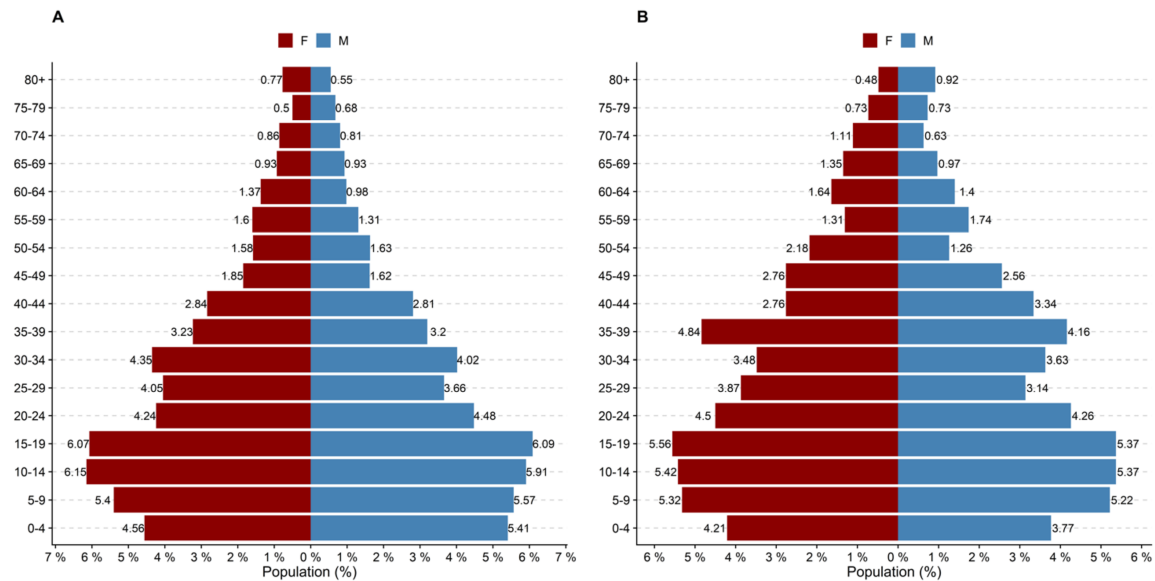

**Supplemental Fig. 3. Representativeness of the study population according to sex and age groups.** Compared with the total population of Mâncio Lima enumerated during the baseline census carried out between November 2015 and April 2016 (A), the study sample has a very similar distribution according to sex and age groups (B).

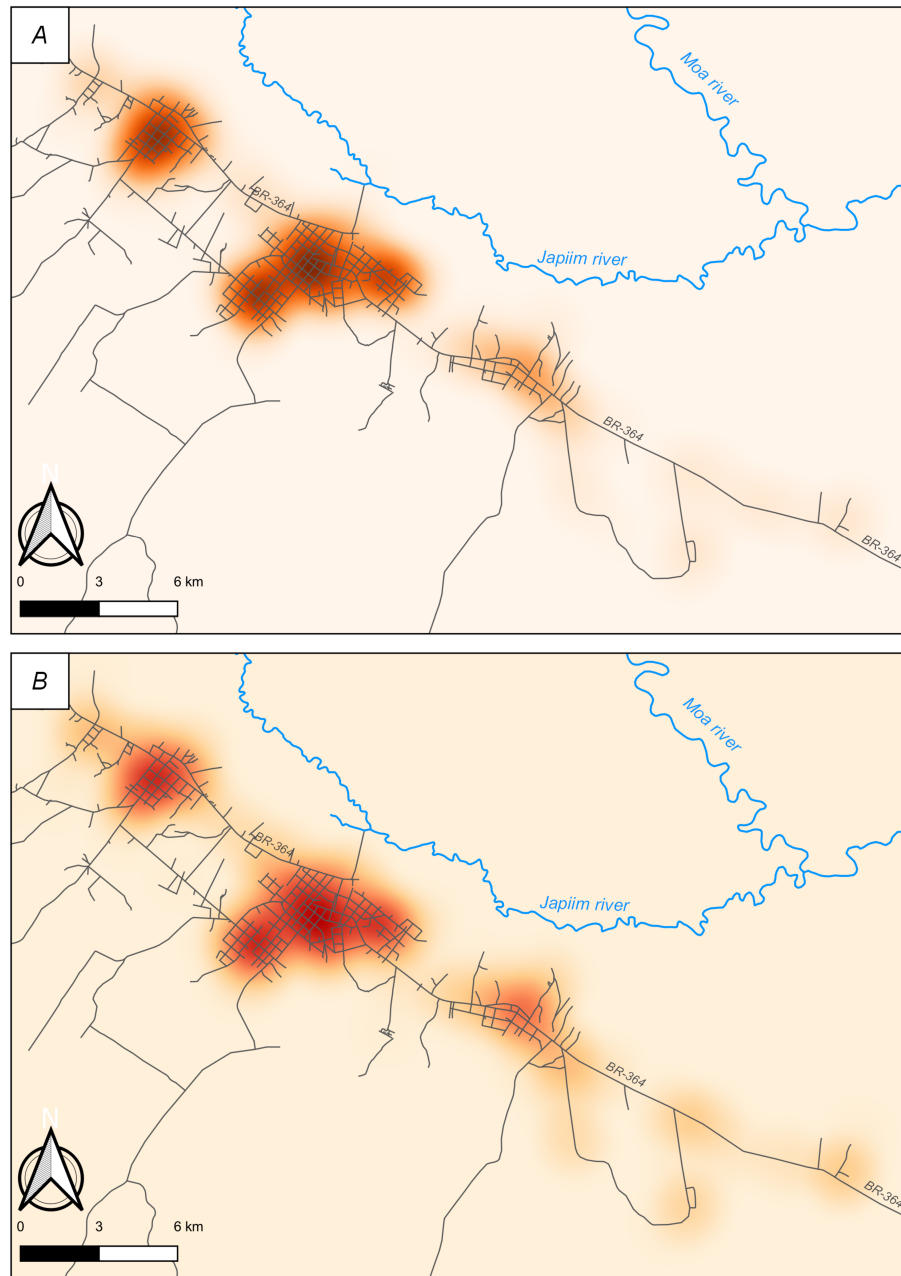

**Supplemental Fig. 4. Representativeness of the study population according to place of residence.** Compared with the total population of Mâncio Lima enumerated during the baseline census carried out between November 2015 and April 2016 (A), the study sample has a nearly equal distribution according to place of residence (B).

**Supplemental Table 1. Short videos about the Mâncio Lima cohort study**

---

| Access                                                                                                | Topic                                      | Producer                    |
|-------------------------------------------------------------------------------------------------------|--------------------------------------------|-----------------------------|
| <a href="https://youtu.be/oEwJPHiBNmc">https://youtu.be/oEwJPHiBNmc</a>                               | Field study set-up, March 2018             | TV USP                      |
| <a href="https://www.youtube.com/watch?v=CBx7z0ApznI">https://www.youtube.com/watch?v=CBx7z0ApznI</a> | House-to-house visits, March 2018          | TV USP                      |
| <a href="https://youtu.be/wE3gJfdRpVo">https://youtu.be/wE3gJfdRpVo</a>                               | Impact of COVID-19 on malaria, August 2020 | Agência FAPESP <sup>a</sup> |

---

<sup>a</sup>Five short videos on COVID-19 research in the field site were produced; a teaser can be found at:

[https://www.youtube.com/watch?v=lg1Ug-T\\_whQ&list=PLPdNbZy8nStgk8tZiXn7M7E9EeWXQ2zI9&index=1](https://www.youtube.com/watch?v=lg1Ug-T_whQ&list=PLPdNbZy8nStgk8tZiXn7M7E9EeWXQ2zI9&index=1).

**Supplemental Table 2. Sociodemographic, occupational, and behavioral characteristics, housing quality, and travel history at the enrollment of the Mâncio Lima cohort study population (individuals who participated in at least one of five consecutive study visits; n= 2,690)**

| Type of measure            | Variable                                           | Description                  | Value         |
|----------------------------|----------------------------------------------------|------------------------------|---------------|
| Demographic                | Age (years)                                        | Range                        | 0-103         |
|                            |                                                    | Mean                         | 26.4          |
|                            |                                                    | Median                       | 22            |
|                            |                                                    | Standard deviation (SD)      | 19.8          |
|                            | Gender                                             | Male                         | 1,311 (48.7%) |
|                            |                                                    | Female                       | 1,379 (51.3%) |
|                            |                                                    | Total                        | 2,690 (100)   |
|                            | Pregnant?<br>(only females)                        | No                           | 1,325 (96.1%) |
|                            |                                                    | Yes                          | 43 (3.1%)     |
|                            |                                                    | Does not know/did not answer | 11 (0.8%)     |
|                            |                                                    | Total                        | 1,379 (100%)  |
|                            | Birthplace                                         | Mâncio Lima                  | 1394 (51.8%)  |
|                            |                                                    | Other, Juruá Valley          | 985 (36.6%)   |
|                            |                                                    | Other, Amazon                | 255 (9.5%)    |
|                            |                                                    | Other, elsewhere in Brazil   | 8 (0.3%)      |
|                            |                                                    | Does not know/did not answer | 48 (1.8%)     |
|                            |                                                    | Total                        | 2,690 (100%)  |
|                            | Literacy<br>(only ≥10 years old)                   | Illiterate                   | 159 (7.6%)    |
|                            |                                                    | Literate                     | 1,911 (91.8%) |
|                            |                                                    | Does not know/did not answer | 12 (0.6%)     |
|                            |                                                    | Total                        | 2,082 (100%)  |
|                            | Highest level of schooling<br>(only ≥25 years old) | Never studied                | 190 (15.5%)   |
|                            |                                                    | Incomplete elementary school | 493 (40.3%)   |
| Complete elementary school |                                                    | 32 (2.6%)                    |               |
| Incomplete high school     |                                                    | 279 (22.8%)                  |               |

|                                                   |                                          |                              |               |
|---------------------------------------------------|------------------------------------------|------------------------------|---------------|
|                                                   |                                          | Complete high school         | 69 (5.6%)     |
|                                                   |                                          | Incomplete college           | 119 (9.7%)    |
|                                                   |                                          | Complete college             | 43 (3.5%)     |
|                                                   |                                          | Total                        | 1,225 (100%)  |
|                                                   | Second residence outside the urban area? | No                           | 2,017 (75.0%) |
|                                                   |                                          | Yes                          | 446 (16.6%)   |
|                                                   |                                          | Does not know/did not answer | 227 (8.4%)    |
|                                                   |                                          | Total                        | 2,690 (100%)  |
| <b>Household</b>                                  | Wall material                            | Masonry                      | 926 (34.4%)   |
|                                                   |                                          | Wood                         | 1,762 (65.6%) |
|                                                   |                                          | Rammed earth                 | 1 (0.0%)      |
|                                                   |                                          | Other                        | 1 (0.0%)      |
|                                                   |                                          | Total                        | 2,690 (100%)  |
|                                                   | Floor material                           | Masonry                      | 247 (9.2%)    |
|                                                   |                                          | Wood                         | 850 (31.6%)   |
|                                                   |                                          | Ceramics                     | 1,386 (51.5%) |
|                                                   |                                          | Cement                       | 202 (7.5%)    |
|                                                   |                                          | Other                        | 5 (0.2%)      |
|                                                   |                                          | Total                        | 2,690 (100%)  |
|                                                   | Roofing material                         | Asbestos                     | 2,176 (80.9%) |
|                                                   |                                          | Aluminium                    | 460 (17.1%)   |
|                                                   |                                          | Wood                         | 15 (0.6%)     |
|                                                   |                                          | Clay tile                    | 17 (0.6%)     |
|                                                   |                                          | Other                        | 22 (0.8%)     |
|                                                   |                                          | Total                        | 2,690 (100%)  |
| Presence of a suspended ceiling beneath the roof? | No                                       | 2,046 (76.1%)                |               |
|                                                   | Yes                                      | 644 (23.9%)                  |               |
|                                                   | Total                                    | 2,690 (100%)                 |               |



|                                                               |        |      |
|---------------------------------------------------------------|--------|------|
| How many rooms are there in this house?                       | Range  | 1-16 |
|                                                               | Mean   | 5.6  |
|                                                               | Median | 5    |
|                                                               | SD     | 1.7  |
| How many rooms are utilized as bedrooms?                      | Range  | 1-8  |
|                                                               | Mean   | 2.5  |
|                                                               | Median | 2    |
|                                                               | SD     | 0.9  |
| How many beds are there in your house?                        | Range  | 1-7  |
|                                                               | Mean   | 3    |
|                                                               | Median | 3    |
|                                                               | SD     | 1.1  |
| How many insecticide-treated bednets are there in your house? | Range  | 0-7  |
|                                                               | Mean   | 1.5  |
|                                                               | Median | 1    |
|                                                               | SD     | 1.5  |
| How many toilets are there in your house?                     | Range  | 0-5  |
|                                                               | Mean   | 1.2  |
|                                                               | Median | 1    |
|                                                               | SD     | 0.6  |
| Number of people in the household                             | Range  | 1-13 |
|                                                               | Mean   | 4.9  |
|                                                               | Median | 4    |

|                     |                                                                                                                   | SD                                                                                                         | 2.2                                                                                   |
|---------------------|-------------------------------------------------------------------------------------------------------------------|------------------------------------------------------------------------------------------------------------|---------------------------------------------------------------------------------------|
|                     | Any household member is beneficiary of social programs (e.g. social security pension, conditional cash transfer)? | No<br>Yes<br>Total                                                                                         | 539 (20.0%)<br>2,151 (80.0%)<br>2,690 (100%)                                          |
| <b>Occupational</b> | Individual work status (only ≥10 years old)                                                                       | Does not work<br>Formal employee<br>Informal employee<br>Employer<br>Does not know/did not answer<br>Total | 1,259 (60.5%)<br>207 (9.9%)<br>567 (27.2%)<br>14 (0.7%)<br>35 (1.7%)<br>23,082 (100%) |
| <b>Behavioral</b>   | Regular fishing                                                                                                   | No<br>Yes<br>Does not know/did not answer<br>Total                                                         | 2,350 (87.4%)<br>296 (11.0%)<br>44 (1.6%)<br>2,690 (100)                              |
|                     | Sleep by the river                                                                                                | No<br>Yes<br>Does not know/did not answer<br>Total                                                         | 2,465 (91.6%)<br>180 (66.9%)<br>45 (1.7%)<br>2,690 (100%)                             |
|                     | Sleep with open or closed window                                                                                  | Closed<br>Open<br>Varies<br>Does not know/did not answer<br>Total                                          | 2,639 (98.1%)<br>11 (0.4%)<br>8 (0.3%)<br>32 (1.2%)<br>2,690 (100%)                   |
|                     | Sleep time                                                                                                        | Mean (hours:minutes)<br>Median                                                                             | 07:52 pm<br>21:00 pm                                                                  |

|                                                            |                                                           |                                     |                                     |               |
|------------------------------------------------------------|-----------------------------------------------------------|-------------------------------------|-------------------------------------|---------------|
|                                                            | Wake-up time                                              | Mean hours:minutes)                 | 06:24 am                            |               |
|                                                            |                                                           | Median                              | 06:00 am                            |               |
|                                                            | Bathing inside or outside the house?                      | Inside                              |                                     | 1,256 (46.7%) |
|                                                            |                                                           | Outside                             |                                     | 1,322 (49.1%) |
|                                                            |                                                           | Both                                |                                     | 67 (2.5%)     |
|                                                            |                                                           | Does not know/did not answer        |                                     | 45 (1.7%)     |
|                                                            |                                                           | Total                               |                                     | 2,690 (100%)  |
|                                                            | Slept under bednet past night?                            | No                                  |                                     | 957 (35.6%)   |
|                                                            |                                                           | Yes, not insecticide-treated        |                                     | 526 (19.6%)   |
|                                                            |                                                           | Yes, insecticide-treated            |                                     | 1,141 (42.4%) |
| Does not know/did not answer                               |                                                           |                                     | 66 (2.4%)                           |               |
| Total                                                      |                                                           |                                     | 2,690 (100%)                        |               |
| <b>Travel history</b>                                      | Overnight trip outside the town within the past 6 months? | No                                  | 1,825 (67.8%)                       |               |
|                                                            |                                                           | Yes                                 | 857 (31.9%)                         |               |
| Does not know/did not answer                               |                                                           | 8 (0.3%)                            |                                     |               |
| Total                                                      |                                                           | 2,690 (100%)                        |                                     |               |
| Most common travel destinations and total duration of stay |                                                           | 1st                                 | City of Cruzeiro do Sul: 4,334 days |               |
|                                                            | 2nd                                                       | Timbaúba: 4,318 days                |                                     |               |
|                                                            | 3rd                                                       | Ramal do Feijão Insosso, 2,300 days |                                     |               |
|                                                            | 4th                                                       | Puyanawa reserve: 2,097 days        |                                     |               |
|                                                            | 5th                                                       | Ramal do Batoque, 2,037 days        |                                     |               |
|                                                            |                                                           |                                     |                                     |               |
